# Supplementary material for: Chromosome separation during Drosophila male meiosis I requires separase-mediated cleavage of the homolog conjunction protein UNO
Source: PLoS Genet. 2020 Oct 1;16(10):e1008928. doi: 10.1371/journal.pgen.1008928 (PMC7529252; doi:10.1371/journal.pgen.1008928)
Supplement: S1 Table — Mass spectrometry was used for identification of co-purified proteins. Spectral counts of the detected peptides are given for each of the identified proteins. Moreover, a fold change of spectral counts in comparison with control (EGFP) and an interaction probability as calculated by SAINTExpress is indicated as well. (XLSX) [file pgen.1008928.s019.xlsx]

## Sheet: sheet1
prey designation		Average spectral counts			SAINT fold change		SAINT interaction probability		spectral counts with bait MNM				spectral counts with bait SNM				spectral counts with bait EGFP
protein ID	gene name	MNM	SNM	EGFP	MNM	SNM	MNM	SNM	replicate 1	replicate 2	replicate 3	replicate 4	replicate 1	replicate 2	replicate 3	replicate 4	replicate 1	replicate 2	replicate 3	replicate 4
M9MRX4	Ank2	115	125.25	0.25	66.58	63.7	1	1	87	100	167	106	90	180	107	124	1	0	0	0
Q7KU09	chinmo	45.5	47.25	0	34.57	31.13	1	1	60	40	52	30	34	43	36	76	0	0	0	0
A1Z6H7	Gp210	24.75	35.5	0	19.49	23.66	1	1	38	25	17	19	11	41	59	31	0	0	0	0
Q9W0F4	SA-2	69	204.25	5.75	7.47	19.38	1	1	75	74	58	69	208	200	199	210	18	1	2	2
P37276	Dhc64C	0.25	17.75	0	1.21	12.03	0	1	1	0	0	0	5	15	10	41	0	0	0	0
Q7JQU5	CG8712/uno	27	16.75	0	20.73	11.88	1	1	28	27	27	26	19	18	14	16	0	0	0	0
M9PF16	beta-Spec	152	153	7.5	13.2	11.7	1	1	149	149	168	142	109	169	162	172	3	5	10	12
O62619-2	PyK	1	12.75	0	1.69	9.3	0.59	1	0	1	2	1	12	13	15	11	0	0	0	0
P05812	Hsp67Ba	5.5	12.5	0	5.03	9.13	1	1	6	5	5	6	12	14	15	9	0	0	0	0
Q59E58	zip	48.75	63	3.75	7.89	9.01	0.99	1	29	57	71	38	37	79	62	74	1	0	4	10
Q9W596	futsch	1.5	12.5	0	2.03	8.92	0.49	1	0	2	4	0	11	15	6	18	0	0	0	0
P05990	r	2.75	21.75	0.75	1.8	8.83	0.5	1	3	3	2	3	13	22	21	31	0	1	0	2
P40423	sqh	12.25	20.5	0.75	6.02	8.44	0.99	1	11	13	14	11	12	29	16	25	0	0	0	3
P46461	comt	3.25	31.25	1.75	1.32	8.19	0.18	1	3	4	1	5	29	38	26	32	0	0	1	6
Q7KN62-3	TER94	116.75	120.75	9.5	8.7	7.89	1	1	156	101	125	85	80	97	152	154	5	10	4	19
Q8INC1	Mhcl	10	18.5	0.75	4.97	7.64	0.93	0.99	7	6	20	7	10	18	7	39	0	0	0	3
Q9VA56	tmod	9	10.5	0	7.55	7.61	1	1	9	7	12	8	6	12	8	16	0	0	0	0
P05661-16	Mhc	16	37	2.75	3.71	7.27	0.59	0.97	8	1	29	26	11	45	50	42	0	0	0	11
P02516	Hsp23	9.25	26.25	1.5	3.13	7.24	1	1	8	9	10	10	22	31	26	26	0	1	2	3
P29742	Chc	3	19.5	1	1.68	7.15	0.38	0.99	0	5	1	6	10	25	18	25	0	0	0	4
Q7KMM4	BcDNA.GH04962	0.25	14.25	0.5	0.8	7.05	0	0.75	0	0	0	1	15	20	22	0	0	1	0	1
Q9VVI0	U4-U6-60K	9	8.75	0	7.45	6.77	1	1	5	5	13	13	10	6	9	10	0	0	0	0
P91926	AP-2alpha	6.25	9	0	5.33	6.7	0.75	1	0	4	15	6	5	12	10	9	0	0	0	0
Q95RY2	CG7945	3.5	8.5	0	3.48	6.33	0.91	1	2	5	6	1	4	14	10	6	0	0	0	0
Q7PLL6	CG17514	0	8.5	0	0	6.26	0	0.99	0	0	0	0	2	4	2	26	0	0	0	0
Q9VQE0	Drp1	0.25	8	0	1.17	6.14	0	1	0	0	1	0	6	6	7	13	0	0	0	0
M9PBI5	alpha-Spec	180.25	182	17.75	6.84	6.1	1	1	172	167	209	173	134	194	205	195	11	6	34	20
P22979	Hsp67Bc	0.75	7.5	0	1.52	5.81	0	1	0	1	1	1	8	11	6	5	0	0	0	0
Q9W2N0	cpa	5.25	7.5	0	4.83	5.77	0.75	1	5	0	9	7	4	8	8	10	0	0	0	0
Q9VFV9	Droj2	3.75	13.5	0.75	2.25	5.76	0.66	0.99	3	5	5	2	9	19	8	18	0	0	0	3
P51592	hyd	12	27.5	2.5	2.99	5.75	0.71	0.99	8	19	13	8	21	41	27	21	0	0	1	9
Q01989-2	jar	37.5	49.75	5.5	4.84	5.71	0.88	0.98	20	39	46	45	42	39	27	91	1	0	0	21
Q9VJD1	CG6453	0.25	8.75	0.25	0.96	5.58	0	0.9	0	0	1	0	13	12	9	1	0	0	0	1
M9PEE1	smid	2.25	7	0	2.6	5.36	0.66	1	1	6	0	2	4	10	4	10	0	0	0	0
Q9V405	Rpt3	0.25	10.25	0.5	0.83	5.27	0	1	0	0	0	1	8	9	6	18	0	0	0	2
Q9VUQ5-2	AGO2	0	7	0	0	5.26	0	1	0	0	0	0	2	14	5	7	0	0	0	0
Q9VAL7	Cnx99A	0.5	9.5	0.5	0.94	5.04	0	1	0	1	1	0	10	10	10	8	0	0	0	2
Q9VH01	Bruce	0.25	6.5	0	1.17	5.02	0	1	0	0	1	0	2	9	5	10	0	0	0	0
A8DY81	Not1	9.25	6.25	0	7.57	4.97	1	1	4	10	13	10	6	8	3	8	0	0	0	0
P11997	Lsp1gamma	0.75	8	0.25	1.25	4.93	0	0.99	0	1	1	1	3	8	5	16	0	0	0	1
Q7KN94	wal	0.25	7.5	0.25	0.97	4.85	0	1	0	1	0	0	7	9	10	4	0	0	0	1
Q7KRI2	lolal	8.5	7.5	0.25	5.94	4.85	1	1	9	8	9	8	8	7	7	8	0	0	0	1
A1Z8P9	Mtor	5.75	8.75	0.5	3.55	4.5	0.86	0.99	2	7	7	7	5	15	6	9	0	0	0	2
Q95029-2	Cp1	1.75	6.75	0.25	1.86	4.45	0.66	1	1	2	2	2	8	7	6	6	0	0	0	1
Q7YU24	Marf	0.75	5.25	0	1.51	4.37	0.41	1	0	1	2	0	4	4	4	9	0	0	0	0
M9NEZ5	Nrg	3	5.75	0	3.16	4.32	0.74	0.72	3	2	7	0	0	16	1	6	0	0	0	0
M9PEH8	CG10289	0	5.25	0	0	4.31	0	1	0	0	0	0	3	6	4	8	0	0	0	0
Q9VXN3	CG8578	1	5.25	0	1.69	4.21	0.43	0.96	0	0	3	1	1	6	2	12	0	0	0	0
Q8SX89	kuk	0	5	0	0	4.2	0	1	0	0	0	0	5	6	3	6	0	0	0	0
Q86B87-10	mod(mdg4)	115	12.5	1.25	38.71	4.18	1	1	103	81	125	151	11	10	15	14	0	3	0	2
Q8IMM6	CG5514	5.25	5	0	4.69	4.18	0.93	1	1	10	4	6	3	4	4	9	0	0	0	0
Q02645-2	hts	46	51.25	7.25	4.16	4.09	1	1	37	49	52	46	39	61	47	58	3	3	11	12
Q9VJH2	mdy	1.25	5	0	1.9	4.03	0.6	0.97	1	3	0	1	1	10	4	5	0	0	0	0
Q9VWH4-2	l(1)G0156	0	4.75	0	0	3.99	0	0.99	0	0	0	0	2	2	2	13	0	0	0	0
A8DYJ2	hts	6.5	4.5	0	5.88	3.95	1	0.72	11	3	8	4	0	1	11	6	0	0	0	0
P26308	Gbeta13F	0	4.5	0	0	3.92	0	1	0	0	0	0	4	4	5	5	0	0	0	0
Q9VIG0	CG9257	1	4.5	0	1.7	3.89	0.59	1	0	2	1	1	5	6	3	4	0	0	0	0
Q8STG9	Sec61alpha	1.25	5.75	0.25	1.57	3.86	0.46	1	1	2	1	1	5	7	5	6	0	0	0	1
Q9V3H2	Rpn11	0.75	4.25	0	1.52	3.75	0	1	0	1	1	1	4	4	4	5	0	0	0	0
Q9W289	GM130	0.25	4.5	0	1.21	3.75	0	0.47	1	0	0	0	0	1	0	17	0	0	0	0
Q24253	AP-1-2beta	3.75	7	0.5	2.51	3.74	0.59	0.98	0	4	9	2	5	13	4	6	0	0	0	2
P36179	Pp2A-29B	3.25	11.75	1.5	1.47	3.73	0.26	0.98	5	3	4	1	13	12	11	11	0	1	0	5
Q9VWB8	Nup205	0.75	4.25	0	1.59	3.73	0.41	0.75	2	0	0	1	0	3	9	5	0	0	0	0
Q24020	fliI	0.5	4.5	0	1.35	3.65	0.24	0.5	0	2	0	0	0	8	0	10	0	0	0	0
C0PDE0	CG7341-RB	0.25	4	0	1.21	3.62	0	1	1	0	0	0	4	4	5	3	0	0	0	0
Q23978	Myo31DF	1.5	4.25	0	2.07	3.6	0.6	0.97	1	0	4	1	1	7	3	6	0	0	0	0
Q9V3U6	26-29-p	0.25	4	0	1.18	3.6	0	1	0	0	0	1	4	4	4	4	0	0	0	0
Q7JZZ3	CG13321	2.25	4	0	2.63	3.58	0.96	0.97	2	2	3	2	1	4	8	3	0	0	0	0
P13607-2	Atpalpha	0	4.25	0	0	3.56	0	0.72	0	0	0	0	1	6	0	10	0	0	0	0
Q9VHJ7	CG11964	9.25	6.75	0.5	5.12	3.54	0.98	0.97	4	8	18	7	4	13	7	3	1	0	0	1
D5AEK7	CG4729	0	4	0	0	3.48	0	0.99	0	0	0	0	2	5	2	7	0	0	0	0
Q9TVM2	emb	0	4	0	0	3.48	0	0.93	0	0	0	0	1	2	1	12	0	0	0	0
Q9W1H8	Thiolase	2.25	8.5	1	1.41	3.47	0.28	0.96	1	2	2	4	8	11	7	8	0	0	0	4
A1Z6Z9	didum	10.25	8	1	4.51	3.45	0.92	0.79	6	9	10	16	15	2	3	12	0	0	0	4
P51123-3	Taf1	15.25	25.5	4.25	2.35	3.42	0.63	0.99	5	14	21	21	20	33	19	30	6	3	0	8
M9PHK2	Tao	3	5	0.25	2.68	3.39	0.81	0.9	5	1	3	3	1	6	5	8	0	0	0	1
Q9VN93-2	CG12163	0	3.75	0	0	3.38	0	1	0	0	0	0	3	5	3	4	0	0	0	0
Q9VE18	Smu1	4	5	0.25	3.14	3.36	0.84	0.97	1	4	7	4	4	11	2	3	0	0	0	1
Q7KV18	Ste:CG33242	2.5	3.75	0	2.78	3.35	0.91	0.99	1	4	2	3	3	6	2	4	0	0	0	0
Q24572	Caf1	2.5	6	0.5	1.96	3.34	0.6	0.93	2	4	2	2	2	8	7	7	0	0	0	2
Q9VMX4	Scox	0	3.5	0	0	3.34	0	0.97	0	0	0	0	4	3	6	1	0	0	0	0
Q23979-3	Myo61F	1.75	4.75	0.25	1.9	3.33	0.56	0.72	3	1	3	0	0	2	8	9	0	0	0	1
A8DZ29	eIF4G	0	3.75	0	0	3.32	0	0.97	0	0	0	0	1	6	4	4	0	0	0	0
P55035	Pros54	3.25	6.75	0.75	2.03	3.3	0.61	0.96	2	4	4	3	7	7	8	5	0	0	0	3
M9PFE5	CG10732	1	3.75	0	1.7	3.26	0.59	0.75	0	1	1	2	0	7	3	5	0	0	0	0
Q9VVG9	CG32176	3.25	3.5	0	3.25	3.26	0.75	0.75	0	3	7	3	4	6	4	0	0	0	0	0
Q9VXQ5	Tcp-1zeta	0	4.75	0.25	0	3.26	0	0.97	0	0	0	0	3	6	2	8	0	0	0	1
P25991-4	su(f)	19.25	28	5	2.52	3.24	0.65	0.97	7	20	33	17	19	25	19	49	8	4	0	8
Q9W414	Rpt4	0.25	4.5	0.25	0.97	3.23	0	1	0	0	0	1	4	4	5	5	0	0	0	1
Q8INT5	dtr	0.5	3.75	0	1.38	3.22	0	0.72	1	0	1	0	0	7	1	7	0	0	0	0
Q960R0	CG3209	0	3.5	0	0	3.22	0	0.99	0	0	0	0	2	3	3	6	0	0	0	0
Q9VW54	Rpn1	3	17.25	3	0.86	3.21	0.01	0.95	3	2	2	5	12	22	15	20	0	2	1	9
Q7KMQ0	Rpt1	2.75	12.75	2	1.03	3.2	0.07	0.98	1	2	3	5	13	16	10	12	0	4	0	4
Q9VD58	CG6439	0	3.5	0	0	3.15	0	0.75	0	0	0	0	0	4	3	7	0	0	0	0
Q8SX92	CG8001	3	4.75	0.25	2.45	3.12	0.9	0.99	2	4	3	3	5	8	3	3	0	0	1	0
Q9VXR3	CG8184	0	3.5	0	0	3.12	0	0.75	0	0	0	0	0	6	3	5	0	0	0	0
Q9VJD0	CG5131	0	3.25	0	0	3.1	0	1	0	0	0	0	3	3	3	4	0	0	0	0
M9PAZ4	IA-2	0	3.25	0	0	3.08	0	0.96	0	0	0	0	1	4	6	2	0	0	0	0
Q9VV75	CG4169	0.5	5.5	0.5	0.94	3.08	0.13	0.94	0	2	0	0	3	11	4	4	0	0	0	2
A1Z9J3	shot	4.25	3.25	0	4.09	3.04	1	0.97	4	3	6	4	1	4	4	4	0	0	0	0
Q9VM75	l(2)k09022	1.25	5.5	0.5	1.3	3.04	0.26	0.95	1	1	1	2	3	5	3	11	0	1	0	1
Q9XYZ5	pic	9.75	15.25	2.75	2.24	3.03	0.58	0.96	5	13	10	11	13	18	13	17	0	5	0	6
P62152	Cam	10	13.75	2.25	2.63	3.02	0.91	0.76	8	11	11	10	5	20	7	23	2	1	1	5
Q7K5K3	CG11876	1.25	3.25	0	1.9	3.02	0.77	0.96	1	1	2	1	2	4	1	6	0	0	0	0
O61491-2	Flo	2.5	3.25	0	2.83	2.98	0.91	0.96	3	1	4	2	1	6	2	4	0	0	0	0
Q9VAW3	Gfat2	0	3.25	0	0	2.97	0	0.75	0	0	0	0	2	6	0	5	0	0	0	0
Q0E9H3	Dscam1	0	3.25	0	0	2.94	0	0.72	0	0	0	0	1	6	0	6	0	0	0	0
Q9V4C8-6	Hcf	0.5	3.25	0	1.34	2.93	0.24	0.75	0	0	2	0	0	7	2	4	0	0	0	0
P09491-2	Tm2	5.75	11.25	2	1.9	2.91	0.44	0.69	4	6	6	7	1	12	7	25	0	0	0	8
Q9W455	CG12728	3.25	3	0	3.3	2.9	0.92	0.99	1	3	5	4	3	5	2	2	0	0	0	0
Q4ABD8	His1:CG33807	4.75	4.75	0.5	3.06	2.89	0.83	0.96	2	6	7	4	5	4	6	4	0	0	0	2
Q7K110	OstDelta	0.25	3	0	1.17	2.88	0	0.99	0	1	0	0	2	4	2	4	0	0	0	0
Q9V3F2	lace	0	3	0	0	2.88	0	0.96	0	0	0	0	2	6	3	1	0	0	0	0
Q9VHC7	rump	6.75	7	1	3.02	2.85	0.69	0.86	2	9	12	4	4	12	9	3	1	0	0	3
F3YDF5	CG42850-RA	0	2.75	0	0	2.84	0	0.72	0	0	0	0	6	4	1	0	0	0	0	0
Q9VJ35	ssp3	7.25	4.25	0.25	4.84	2.82	0.84	0.87	1	8	12	8	2	11	1	3	0	1	0	0
Q9Y162	Vps4	0.25	2.75	0	1.18	2.78	0	0.99	0	0	0	1	3	3	2	3	0	0	0	0
P18432	Mlc2	6	8.5	1.5	2.34	2.76	0.54	0.75	4	2	8	10	2	9	8	15	0	0	0	6
Q9VVU6	CG6841	10	9.75	1.75	3.12	2.75	0.68	0.75	0	12	18	10	7	19	3	10	1	0	0	6
M9PCA2	CG5261	1.5	3.75	0.25	1.73	2.74	0.56	0.87	2	2	2	0	1	3	2	9	0	0	0	1
Q9NBD7	chb	0	2.75	0	0	2.73	0	0.96	0	0	0	0	1	2	2	6	0	0	0	0
Q9VEW0	CG10317	2.5	2.75	0	2.81	2.73	0.91	0.97	2	1	4	3	1	3	3	4	0	0	0	0
Q9V9P7	CG1428	0	2.75	0	0	2.72	0	0.74	0	0	0	0	2	6	3	0	0	0	0	0
P48605	Cctgamma	1	4.5	0.5	1.18	2.71	0.21	0.91	0	4	0	0	4	4	2	8	0	0	0	2
Q0E8E8	Mpcp	0.5	4.75	0.5	0.92	2.71	0	0.95	0	1	0	1	4	9	3	3	0	1	0	1
Q9VSF2	MED24	1	4.5	0.5	1.18	2.71	0.26	0.91	0	2	2	0	4	4	2	8	0	0	0	2
P06754-5	Tm1	12	15.75	3.25	2.4	2.69	0.69	0.76	11	11	12	14	7	16	13	27	2	1	2	8
P06754	Tm1	10.75	14.5	3	2.34	2.68	0.62	0.82	10	10	11	12	8	17	11	22	0	0	3	9
Q9W0S5	miple	6	6.75	1	2.69	2.67	0.8	0.99	6	5	3	10	7	7	6	7	1	1	1	1
P19351-2	up	0.5	2.75	0	1.36	2.66	0.24	0.5	0	0	0	2	0	2	0	9	0	0	0	0
Q04691	Fbp1	1.25	11	2.25	0.65	2.66	0.01	0.71	1	3	0	1	2	19	12	11	0	0	0	9
Q6NR46	Spt-I	0	2.5	0	0	2.65	0	0.72	0	0	0	0	5	4	1	0	0	0	0	0
A1ZAI5	CG5065	0	4.25	0.5	0	2.64	0	0.94	0	0	0	0	4	3	4	6	0	0	0	2
P35415	Prm	5	9	1.75	1.82	2.62	0.4	0.69	1	2	8	9	0	8	7	21	0	0	0	7
A1Z843	CG1371	0	2.5	0	0	2.6	0	0.96	0	0	0	0	2	4	3	1	0	0	0	0
O46106	noi	8.25	7	1.25	3.28	2.56	0.85	0.89	5	10	8	10	5	12	6	5	0	1	0	4
Q9VVH5	CG7580	0	2.5	0	0	2.56	0	0.96	0	0	0	0	2	5	2	1	0	0	0	0
Q9VZL3	Sc2	0.5	2.5	0	1.35	2.56	0.24	0.96	0	2	0	0	2	5	2	1	0	0	0	0
P47949	TpnC73F	0.5	2.5	0	1.36	2.55	0.24	0.47	0	0	0	2	0	0	1	9	0	0	0	0
Q05825	ATPsyn-beta	4.75	17.5	4	0.93	2.55	0	0.79	3	6	3	7	12	19	12	27	3	1	2	10
Q7K485	cathD	1.5	6.75	1.25	0.99	2.55	0.09	0.91	2	1	3	0	7	8	7	5	1	0	0	4
P15007-2	Eno	0.5	2.5	0	1.35	2.51	0.24	0.93	0	2	0	0	1	5	1	3	0	0	0	0
O18413	Pros45	3.5	13.5	3	0.94	2.5	0	0.94	5	3	3	3	11	17	11	15	1	2	2	7
Q7KRW8-3	CG1646	0.75	2.5	0	1.52	2.49	0.25	0.9	0	3	0	0	1	7	1	1	0	0	0	0
Q9W0R0	Cdc5	3.5	5.25	0.75	2.1	2.49	0.54	0.68	1	4	7	2	1	15	2	3	0	0	0	3
Q9W0B8	alphaCop	0.5	2.5	0	1.36	2.46	0.24	0.5	0	0	0	2	0	5	0	5	0	0	0	0
P07701	Sgs5	0.25	2.25	0	1.17	2.45	0	0.98	0	1	0	0	2	2	2	3	0	0	0	0
Q7K4N3	Cbp80	5	7	1.25	2.03	2.45	0.51	0.98	2	2	10	6	7	9	6	6	3	1	0	1
Q8IQW5	HspB8	0.75	2.25	0	1.56	2.44	0	0.96	1	1	0	1	1	2	3	3	0	0	0	0
Q95U38	skap	0	2.25	0	0	2.44	0	0.98	0	0	0	0	2	3	2	2	0	0	0	0
P48603	cpb	2	4	0.5	1.75	2.42	0.49	0.8	3	0	2	3	1	5	2	8	0	0	0	2
Q9VAN7	Pglym78	1	3	0.25	1.43	2.42	0	0.88	1	1	1	1	4	5	2	1	0	0	0	1
Q9VHY5	Taf7	4.25	8.5	1.75	1.53	2.41	0.36	0.79	1	3	6	7	6	10	4	14	2	1	0	4
Q9VTX8	CG10616	0	2.25	0	0	2.41	0	0.93	0	0	0	0	1	4	3	1	0	0	0	0
Q9VI57	Dpck	0	2.25	0	0	2.39	0	0.93	0	0	0	0	2	5	1	1	0	0	0	0
Q9VKY2	Cand1	3	12.5	2.75	0.86	2.38	0.01	0.7	4	5	2	1	5	10	8	27	3	4	1	3
B7Z0Q3	CG11857	0	2	0	0	2.33	0	0.96	0	0	0	0	3	2	2	1	0	0	0	0
Q27237	l(2)tid	0	2.25	0	0	2.33	0	0.72	0	0	0	0	0	5	1	3	0	0	0	0
Q4QPU3	CG15908	0	2	0	0	2.33	0	0.96	0	0	0	0	2	1	3	2	0	0	0	0
Q9V436	Rpn12	0.75	2.75	0.25	1.28	2.33	0	0.94	1	0	1	1	3	2	4	2	0	0	0	1
Q9VXH4	CG9921	0	2	0	0	2.33	0	0.96	0	0	0	0	3	2	2	1	0	0	0	0
O01666	ATPsyn-gamma	0.75	3.75	0.5	1.07	2.32	0	0.83	0	1	1	1	1	5	3	6	0	0	0	2
Q9W1G7	Nap1	5.25	6.75	1.5	2.04	2.32	0.54	0.86	3	6	6	6	6	5	8	8	1	0	0	5
P48159	RpL23	1.25	3	0.25	1.45	2.31	0.34	0.96	0	4	1	0	3	2	3	4	0	0	1	0
Q9VC45	asp	0.75	2	0	1.52	2.31	0.25	0.96	0	3	0	0	2	1	2	3	0	0	0	0
P20227	Tbp	1.25	2.75	0.25	1.54	2.3	0.47	0.94	0	2	2	1	3	2	2	4	0	0	0	1
Q8MRW1	CG40042	0	2	0	0	2.3	0	0.93	0	0	0	0	3	3	1	1	0	0	0	0
Q9Y134	l(2)35Df	2.25	2	0	2.6	2.3	0.91	0.93	1	3	2	3	1	1	3	3	0	0	0	0
Q9VPR5	CG2807	10.25	9	2	2.92	2.29	0.75	0.67	5	11	14	11	6	19	4	7	3	0	0	5
Q9W0M7	CG13900-RA	18.25	21	5.5	2.22	2.28	0.64	0.97	11	16	24	22	19	28	20	17	7	3	3	9
P16378-2	G-oalpha47A	0	2	0	0	2.27	0	0.96	0	0	0	0	1	2	2	3	0	0	0	0
Q24246-10	sw	0	2	0	0	2.27	0	0.96	0	0	0	0	2	3	1	2	0	0	0	0
Q8MQJ9	brat	0	2	0	0	2.26	0	0.74	0	0	0	0	2	2	0	4	0	0	0	0
Q94517	Rpd3	0	2	0	0	2.26	0	0.74	0	0	0	0	0	2	3	3	0	0	0	0
Q7KTI0	fu12	0	2	0	0	2.25	0	0.93	0	0	0	0	2	4	1	1	0	0	0	0
Q9VJ19	RpL30	8.5	9	2	2.38	2.25	0.86	0.97	6	9	10	9	7	12	8	9	2	3	1	2
Q9VKQ9	Dpy-30L1	1.75	2	0	2.29	2.25	0.89	0.96	2	2	1	2	1	3	2	2	0	0	0	0
Q9VQ50	CG31933	0.5	2	0	1.35	2.25	0	0.93	0	0	1	1	2	4	1	1	0	0	0	0
Q9VJ58	Faf	0	2.5	0.25	0	2.23	0	0.87	0	0	0	0	4	1	3	2	0	0	0	1
Q9VZQ3	kst	0	2.75	0.25	0	2.23	0	0.94	0	0	0	0	4	3	2	2	1	0	0	0
Q9VCN3	CG4434	0	2	0	0	2.22	0	0.93	0	0	0	0	1	4	1	2	0	0	0	0
Q9VPY2	Plap	0.5	2	0	1.38	2.21	0	0.5	1	1	0	0	0	5	3	0	0	0	0	0
Q0E9E2	CG1516	1	4	0.75	1.04	2.2	0.18	0.82	0	1	0	3	2	3	7	4	0	0	0	3
Q8T4C4	ms(3)72Dt	3.25	6.75	1.5	1.4	2.19	0.27	0.81	3	7	0	3	5	8	4	10	0	3	0	3
Q9U9Q1	RfC38	2	2.75	0.25	2	2.19	0.7	0.8	1	2	3	2	1	6	1	3	0	0	0	1
O76928	cm	0.5	2.5	0.25	1.11	2.17	0	0.8	0	0	1	1	3	1	1	5	0	0	0	1
Q95RI5	fax	7	14.75	4.25	1.26	2.17	0.01	0.74	7	8	7	6	13	15	13	18	1	2	1	13
Q9W2H9	CG9754	1.25	4.5	0.75	1.06	2.17	0.19	0.82	0	3	1	1	2	5	3	8	1	0	1	1
P07764-2	Ald	1	1.75	0	1.74	2.16	0.59	0.95	1	0	1	2	2	1	2	2	0	0	0	0
P39018	RpS19a	1.5	2.75	0.25	1.68	2.16	0.51	0.65	0	3	2	1	1	7	0	3	0	0	0	1
Q7K0L4	CG7611	0	1.75	0	0	2.16	0	0.95	0	0	0	0	2	1	2	2	0	0	0	0
Q8T3U2	RpS23	3	3.25	0.5	2.23	2.15	0.72	0.88	3	3	3	3	3	4	2	4	0	0	0	2
Q9W098	CG12035-RA	0	1.75	0	0	2.15	0	0.95	0	0	0	0	2	2	2	1	0	0	0	0
Q9W4V8	ttm50	0	1.75	0	0	2.15	0	0.95	0	0	0	0	2	2	2	1	0	0	0	0
M9ND65	CG16854	0	2.5	0.25	0	2.14	0	0.87	0	0	0	0	2	4	3	1	0	0	0	1
Q9VL70	yip2	0	2.5	0.25	0	2.14	0	0.93	0	0	0	0	2	3	2	3	0	0	0	1
Q7JXF5	Nup62	0.5	1.75	0	1.35	2.13	0	0.71	0	1	0	1	0	1	4	2	0	0	0	0
Q8MSS1	lva	0	1.75	0	0	2.13	0	0.95	0	0	0	0	2	2	1	2	0	0	0	0
Q9VLQ1	wol	0	1.75	0	0	2.13	0	0.93	0	0	0	0	1	1	2	3	0	0	0	0
O46036-2	CtBP	2	1.75	0	2.37	2.11	0.5	0.95	0	4	4	0	1	2	2	2	0	0	0	0
Q8SXX1	PIP4K	1	4.5	0.75	0.94	2.11	0.17	0.73	0	1	3	0	0	4	5	9	1	1	1	0
Q9VMU4	RpL37A	1.25	1.75	0	1.87	2.11	0.65	0.95	0	1	2	2	1	2	2	2	0	0	0	0
Q9VUM1	Prp31	2.5	1.75	0	2.74	2.11	0.68	0.74	0	1	5	4	2	2	0	3	0	0	0	0
A1ZBL5	par-1	0	1.75	0	0	2.1	0	0.71	0	0	0	0	0	1	2	4	0	0	0	0
Q4V5H1	CG17266	1.75	1.75	0	2.21	2.09	0.66	0.74	0	1	4	2	2	3	0	2	0	0	0	0
Q9GQN5	XNP	0.25	1.75	0	1.18	2.09	0	0.71	0	0	0	1	1	4	2	0	0	0	0	0
Q9VV73	nxf2	7.25	13.25	3.75	1.36	2.08	0.11	0.6	2	7	9	11	9	17	9	18	3	4	0	8
Q9W062	Mfap1	1.75	1.75	0	2.25	2.08	0.89	0.74	1	2	2	2	0	2	2	3	0	0	0	0
P26270	Mov34	1.5	6.25	1.5	0.89	2.07	0.02	0.76	2	1	1	2	4	9	4	8	1	1	0	4
P48601	Pros26.4	0	4.75	1	0	2.07	0	0.6	0	0	0	0	0	8	2	9	0	0	0	4
Q24090	Snr1	0.25	1.75	0	1.17	2.07	0	0.5	0	0	1	0	2	5	0	0	0	0	0	0
Q24186	RpS5a	1.75	2.5	0.25	1.86	2.07	0.66	0.72	1	2	2	2	0	4	2	4	0	0	0	1
Q8SX83-3	spen	0.5	2.25	0.25	1.11	2.07	0	0.71	0	1	1	0	1	1	6	1	0	0	0	1
Q9V3P6	Rpn2	2.25	14	4	0.55	2.07	0	0.81	3	3	2	1	12	16	12	16	1	5	2	8
Q9VFE4	RpS5b	3	3.25	0.5	2.15	2.07	0.59	0.68	0	5	5	2	0	6	2	5	0	0	0	2
E1JJ04	Dhc98D	0	1.75	0	0	2.06	0	0.71	0	0	0	0	0	2	1	4	0	0	0	0
Q8IPJ9	CG31642	0	2.5	0.25	0	2.06	0	0.72	0	0	0	0	0	5	2	3	0	0	0	1
Q9VFP0	CG3061	0	1.75	0	0	2.06	0	0.71	0	0	0	0	0	2	1	4	0	0	0	0
P61857	betaTub85D	44.75	82.75	26	1.26	2.05	0	0.99	42	44	43	50	78	86	82	85	23	26	19	36
Q9VK36	CG5204	1	1.75	0	1.72	2.05	0.59	0.72	1	2	1	0	0	3	1	3	0	0	0	0
Q9VTL1	PCID2	1.75	3	0.5	1.59	2.05	0.4	0.67	2	0	4	1	2	5	5	0	0	0	0	2
P41092	RpL27A	2.75	3	0.5	2.07	2.03	0.64	0.81	1	3	3	4	3	4	1	4	0	0	0	2
P06603	alphaTub84B	19.5	37.25	11.5	1.24	2.02	0	0.94	21	17	19	21	33	41	30	45	10	10	9	17
Q95RB1	CG14641	1	2.5	0.25	1.42	2.02	0.37	0.63	1	1	2	0	0	7	1	2	0	0	0	1
Q9VCH1	eIF4G2	7	13.25	3.75	1.3	2.02	0.13	0.74	4	7	6	11	6	17	14	16	1	4	3	7
Q9VUZ0	SsRbeta	0	2.25	0.25	0	2.02	0	0.91	0	0	0	0	2	2	2	3	0	0	0	1
P52034-2	Pfk	1	2.25	0.25	1.43	2.01	0	0.85	1	1	1	1	2	2	1	4	0	0	0	1
Q05783	HmgD	3.5	3.75	0.75	2	2.01	0.66	0.74	2	4	3	5	5	3	6	1	1	0	1	1
Q9VH07	pont	2	3.75	0.75	1.49	2.01	0.39	0.71	2	3	3	0	2	6	1	6	0	0	0	3
P48810	Hrb87F	3.25	5	1.25	1.59	1.98	0.33	0.8	3	4	4	2	4	7	5	4	1	0	0	4
P52654-2	TfIIA-L	1.25	2.25	0.25	1.54	1.97	0.42	0.85	0	0	3	2	1	4	2	2	0	0	0	1
Q0E9B6	RpS11	6	6.75	1.75	2	1.97	0.67	0.81	6	7	5	6	7	9	4	7	1	2	1	3
Q7K1V5	jagn	0	1.5	0	0	1.97	0	0.93	0	0	0	0	2	2	1	1	0	0	0	0
Q94516	ATPsyn-b	0	1.5	0	0	1.97	0	0.69	0	0	0	0	1	0	1	4	0	0	0	0
P0DKM0	Ccdc56	0	1.5	0	0	1.96	0	0.71	0	0	0	0	2	3	1	0	0	0	0	0
P14130	RpS14a	3	4.5	1	1.6	1.96	0.38	0.85	2	5	3	2	3	6	5	4	1	0	1	2
Q9VTQ9	Rpt4R	2.5	5.75	1.5	1.17	1.96	0.17	0.9	2	5	1	2	6	7	5	5	1	2	0	3
Q9VUC6-2	CG32138	0	1.5	0	0	1.96	0	0.9	0	0	0	0	1	1	1	3	0	0	0	0
O97159	Mi-2	6.75	9.5	2.75	1.61	1.95	0.33	0.81	7	9	7	4	7	10	13	8	2	2	2	5
P22700-2	Ca-P60A	0	4.75	1.25	0	1.95	0	0.65	0	0	0	0	4	8	6	1	0	0	0	5
Q9VGK7	Elp1	0	1.5	0	0	1.95	0	0.74	0	0	0	0	2	2	0	2	0	0	0	0
M9PHA0	bif	0.75	1.5	0	1.51	1.94	0.25	0.69	0	0	3	0	1	1	0	4	0	0	0	0
Q7KLV9-2	Rpn6	1.5	8.25	2.5	0.65	1.94	0	0.65	1	1	2	2	8	10	4	11	1	1	0	8
Q9VBU9	RpS27	2.25	3.5	0.75	1.54	1.94	0.37	0.74	1	4	2	2	3	5	5	1	1	0	0	2
P35381	blw	5.5	14.25	4.5	0.96	1.93	0	0.57	5	5	5	7	12	16	11	18	2	2	3	11
Q8SZ87	Dim1	8	6.25	1.75	2.56	1.93	0.66	0.74	4	6	12	10	7	6	4	8	0	3	0	4
Q9V3V6	Rpt5	7.25	16.25	5.25	1.04	1.93	0	0.63	7	8	7	7	16	13	21	15	3	7	2	9
Q9VJI7	LSm7	0.25	1.5	0	1.17	1.93	0	0.9	0	0	1	0	1	3	1	1	0	0	0	0
Q9VWG3	RpS10b	6.5	7	2	2.07	1.93	0.5	0.65	7	7	5	7	5	10	4	9	0	2	0	6
Q9VY43	mud	0.5	1.5	0	1.34	1.93	0	0.5	0	1	1	0	0	3	3	0	0	0	0	0
O16797	RpL3	22	21.5	7	2.16	1.92	0.71	0.8	13	25	27	23	20	23	21	22	6	7	3	12
P48149	RpS15Aa	2.75	3	0.5	2.03	1.92	0.7	0.67	2	3	3	3	2	5	0	5	1	0	0	1
Q7K3J0	CG8258	2.75	3.25	0.75	1.82	1.92	0.52	0.8	2	3	2	4	4	2	3	4	0	0	0	3
Q9W3W8	RpL17	1	1.5	0	1.73	1.92	0	0.71	1	1	1	1	1	2	0	3	0	0	0	0
M9PF85	Rcd-1	1.75	1.5	0	2.22	1.91	0.72	0.71	0	2	2	3	0	2	1	3	0	0	0	0
P43248	spel1	0	1.5	0	0	1.91	0	0.69	0	0	0	0	1	4	1	0	0	0	0	0
Q8SWR8-2	Atx2	1	1.5	0	1.83	1.91	0.25	0.69	4	0	0	0	1	4	1	0	0	0	0	0
Q8T0L3	Uba1	2.25	5.75	1.5	1.13	1.91	0.12	0.66	4	3	0	2	4	11	4	4	0	1	1	4
Q9VMH1	WDR79	0.25	1.5	0	1.18	1.91	0	0.71	0	0	0	1	1	3	0	2	0	0	0	0
Q9VVK6	CG32186	0.5	3	0.5	0.92	1.91	0	0.8	1	0	0	1	1	3	3	5	0	2	0	0
Q9W384	dalao	1.25	1.5	0	1.9	1.91	0.77	0.71	1	1	2	1	1	3	0	2	0	0	0	0
Q9VZS5	RpL28	6.25	6.75	2	1.95	1.89	0.47	0.77	5	7	7	6	6	7	7	7	1	2	0	5
O61492-2	Flo-2	1	1.5	0	1.68	1.88	0.25	0.69	0	0	4	0	0	4	1	1	0	0	0	0
Q9V9V0	CstF-50	20	28	9.25	1.51	1.88	0.25	0.56	13	22	27	18	23	24	23	42	12	8	5	12
Q9VG78	pps	1	2	0.25	1.45	1.88	0.25	0.56	4	0	0	0	1	0	6	1	1	0	0	0
P56538	eIF6	3.25	4.75	1.25	1.54	1.87	0.32	0.76	2	4	4	3	5	7	3	4	1	1	0	3
P05389	RpLP2	14.75	14	4.5	2.13	1.86	0.83	0.89	12	15	17	15	16	12	14	14	6	4	3	5
P54385-2	Gdh	1.75	3.5	0.75	1.28	1.86	0.26	0.8	1	1	3	2	4	5	3	2	0	1	1	1
Q9VTN7	CG10907	2.5	2.25	0.25	2.18	1.86	0.76	0.7	2	4	3	1	0	2	2	5	0	0	1	0
Q9VWD9	Ubqn	0.25	1.5	0	1.21	1.86	0	0.5	1	0	0	0	0	4	0	2	0	0	0	0
B7Z0I8	CG14896	1	2	0.25	1.34	1.85	0.38	0.84	0	2	2	0	2	1	3	2	1	0	0	0
Q7K579	Dgkepsilon	0	1.25	0	0	1.85	0	0.71	0	0	0	0	2	1	2	0	0	0	0	0
Q8INN5	Unc-115b	0.5	1.5	0	1.35	1.85	0.24	0.47	0	2	0	0	0	5	0	1	0	0	0	0
Q9VJE5	CLIP-190	3.25	7	2	1.13	1.83	0.07	0.39	2	3	5	3	3	5	3	17	2	0	2	4
Q9VRL0	CG4769	0	3.25	0.75	0	1.83	0	0.68	0	0	0	0	3	7	1	2	0	0	0	3
Q9VXR5	CG9281	0	1.25	0	0	1.83	0	0.9	0	0	0	0	2	1	1	1	0	0	0	0
P13496	Gl	0	1.25	0	0	1.82	0	0.9	0	0	0	0	1	1	2	1	0	0	0	0
Q24133	DnaJ-1	1	2	0.25	1.4	1.82	0.37	0.65	0	2	1	1	0	3	1	4	0	0	0	1
Q24251	ATPsyn-d	1	3.75	1	0.92	1.82	0.06	0.71	0	1	1	2	2	3	3	7	0	0	0	4
Q9VQ29	RFeSP	0	1.25	0	0	1.81	0	0.71	0	0	0	0	1	2	2	0	0	0	0	0
Q0E8F2	CG32103-RB	0	1.25	0	0	1.8	0	0.9	0	0	0	0	1	1	1	2	0	0	0	0
M9ND57	CG7546	0	2	0.25	0	1.79	0	0.63	0	0	0	0	0	5	1	2	0	0	0	1
O97183	RpII33	0.5	1.25	0	1.34	1.79	0	0.9	0	1	1	0	1	2	1	1	0	0	0	0
P10987	Act5C	79.25	98	34.5	1.65	1.79	0.01	0.29	74	67	96	80	62	83	97	150	37	23	35	43
Q9I7U4-3	sls	0.5	1.25	0	1.35	1.79	0.24	0.47	0	2	0	0	0	0	1	4	0	0	0	0
Q9V7Y2	Sply	0	1.25	0	0	1.79	0	0.9	0	0	0	0	1	2	1	1	0	0	0	0
B7Z060	Taf4	3	4	1	1.63	1.78	0.39	0.57	2	5	4	1	1	7	2	6	0	0	1	3
Q9V3H8	Nxt1	1.75	2.5	0.5	1.54	1.78	0.38	0.7	1	1	1	4	2	1	2	5	1	0	0	1
P45889	Arp87C	0	1.25	0	0	1.77	0	0.68	0	0	0	0	0	1	1	3	0	0	0	0
Q9GQN0	Ranbp16	0	1.25	0	0	1.77	0	0.68	0	0	0	0	0	1	1	3	0	0	0	0
Q9VWK5	Ulp1	3.75	4.75	1.25	1.63	1.77	0.42	0.79	3	4	5	3	4	7	4	4	3	0	1	1
Q9W141-2	CG4692	0	1.25	0	0	1.77	0	0.71	0	0	0	0	1	2	0	2	0	0	0	0
Q5LJZ2	Set1	0.25	1.25	0	1.17	1.76	0	0.71	0	0	1	0	0	2	1	2	0	0	0	0
Q7JUZ6	mrj	0.5	1.25	0	1.35	1.76	0	0.71	0	0	1	1	0	2	1	2	0	0	0	0
Q8IRJ8-1	thoc7	4.75	5	1.5	1.84	1.76	0.46	0.69	4	4	6	5	5	6	6	3	3	0	0	3
Q9VFT3	Rbp4	0.25	1.25	0	1.17	1.76	0	0.71	0	1	0	0	0	2	1	2	0	0	0	0
Q9VJ26	CG10641	0.75	1.25	0	1.51	1.76	0.25	0.68	0	0	3	0	1	3	0	1	0	0	0	0
Q9VEC1	MED17	5.75	9	3	1.33	1.75	0.12	0.51	3	8	8	4	6	11	6	13	3	1	1	7
Q9VN50	eIF3-S5-1	1	1.75	0.25	1.43	1.75	0	0.64	1	1	1	1	1	3	3	0	0	0	0	1
Q9VTU4	CG5642	1.5	3.5	1	1.1	1.75	0.18	0.72	0	3	2	1	3	5	4	2	0	0	0	4
Q9W1F4	thoc5	7.25	6.5	2	2.14	1.75	0.63	0.6	6	5	11	7	6	11	5	4	2	3	0	3
P17704	RpS17	3.25	3	0.75	2.05	1.74	0.62	0.69	3	4	3	3	2	5	1	4	0	0	0	3
Q8MRG6	Prp3	1.5	1.75	0.25	1.69	1.74	0.51	0.69	0	1	2	3	2	2	0	3	0	0	0	1
Q95TK5	CG1635	0.75	1.25	0	1.51	1.74	0.25	0.49	0	0	3	0	0	2	0	3	0	0	0	0
Q9W229	RpS24	3.75	4.25	1.25	1.72	1.74	0.42	0.77	3	4	4	4	4	5	4	4	1	1	0	3
P54367	CkIalpha	0.5	1.75	0.25	1.11	1.73	0	0.77	0	1	1	0	1	3	2	1	0	0	0	1
Q8MZI3	CG10077	3	5	1.5	1.3	1.73	0.29	0.48	0	8	4	0	4	12	3	1	0	0	1	5
Q9VHP0	bel	1.25	4.25	1.25	0.9	1.73	0.13	0.64	0	4	0	1	0	7	4	6	0	0	0	5
Q7KVH9-2	CG4091	2	2.25	0.5	1.72	1.72	0.51	0.78	2	2	2	2	2	2	2	3	0	0	0	2
Q9VIP1	Taf13	0.5	1.75	0.25	1.12	1.72	0.19	0.77	0	0	0	2	1	3	1	2	0	0	0	1
Q9VWP1	CG7288	14.75	14	4.75	1.94	1.72	0.5	0.79	5	10	27	17	16	14	12	14	4	2	8	5
P49846	Taf5	15	20.5	7.25	1.43	1.71	0.22	0.66	12	21	12	15	19	22	14	27	5	5	9	10
Q9W1N3	levy	0	2.25	0.5	0	1.71	0	0.78	0	0	0	0	2	3	2	2	0	0	0	2
P23696	mts	0	1.75	0.25	0	1.7	0	0.63	0	0	0	0	0	2	1	4	0	0	0	1
P25007	Cyp1	2.25	3.25	1	1.43	1.7	0.34	0.61	2	3	0	4	5	4	3	1	0	0	0	4
Q9V4D4	bip2	15.75	23.25	8.5	1.33	1.7	0	0.46	11	17	16	19	16	27	22	28	8	4	7	15
Q9VRL8	blanks	4.5	5.5	2	1.58	1.7	0.24	0.6	4	5	4	5	6	6	7	3	0	0	0	8
P40796	La	2.25	1.75	0.25	2.14	1.69	0.71	0.63	1	2	4	2	1	4	0	2	0	0	0	1
P31409	Vha55	0.5	1	0	1.38	1.68	0	0.68	1	0	1	0	2	1	1	0	0	0	0	0
Q9V3Z4	Rpn5	4.75	13.5	5	0.76	1.68	0	0.41	2	5	6	6	13	14	12	15	3	4	3	10
O18640	Rack1	22.5	22	8.5	1.88	1.67	0.1	0.08	17	25	25	23	22	23	20	23	5	11	3	15
Q08473-2	sqd	1.75	2.75	0.75	1.37	1.67	0.29	0.67	1	1	4	1	2	5	3	1	0	0	0	3
Q9V9S3	CG2053	2.25	2.25	0.5	1.79	1.67	0.55	0.76	2	2	3	2	2	2	2	3	1	0	0	1
Q9VPT8	Clp	17	20.25	7	1.63	1.67	0.33	0.5	15	24	18	11	10	28	11	32	5	7	9	7
Q9W1B9	RpL12	6.25	6.75	2.25	1.73	1.67	0.41	0.66	4	6	9	6	6	9	5	7	2	2	1	4
Q9W351	CG16892-RA	0.25	1	0	1.21	1.67	0	0.47	1	0	0	0	0	0	3	1	0	0	0	0
E2QDA1	CG15323-RA	0.75	1	0	1.52	1.66	0.41	0.47	0	0	2	1	0	1	3	0	0	0	0	0
O61231	RpL10	8.5	7.25	2.5	2.11	1.66	0.65	0.61	6	7	11	10	6	9	5	9	2	2	1	5
P80455	RpS12	7.5	8	2.75	1.73	1.66	0.43	0.7	6	8	8	8	6	8	9	9	3	4	1	3
Q24407	ATPsyn-Cf6	0.75	1	0	1.52	1.66	0	0.68	0	1	1	1	1	0	1	2	0	0	0	0
Q9V4Q8	U2A	1.5	1	0	2.04	1.66	0.66	0.68	0	2	3	1	1	0	1	2	0	0	0	0
Q9VVS4	MED11	0.5	1	0	1.34	1.66	0	0.68	0	1	1	0	1	0	1	2	0	0	0	0
Q9XZ53	OstStt3	0	1	0	0	1.66	0	0.68	0	0	0	0	1	0	1	2	0	0	0	0
Q9VC36	polybromo	0.5	1	0	1.34	1.65	0.24	0.49	0	0	2	0	2	2	0	0	0	0	0	0
Q9VSA3	CG12262	0	3.25	1	0	1.65	0	0.71	0	0	0	0	2	4	3	4	0	0	0	4
A1Z9K4	RN-tre	0.25	1	0	1.17	1.64	0	0.68	0	0	1	0	0	1	2	1	0	0	0	0
O76861	EG:100G10.1	0	1	0	0	1.64	0	0.68	0	0	0	0	0	1	2	1	0	0	0	0
P46222	RpL11	3.25	3.5	1	1.67	1.64	0.51	0.71	1	4	4	4	3	5	3	3	1	0	1	2
Q7K4H1	CG8185	0	1	0	0	1.64	0	0.68	0	0	0	0	0	1	2	1	0	0	0	0
Q8IPN1	tacc	0	1	0	0	1.64	0	0.68	0	0	0	0	1	2	1	0	0	0	0	0
Q9VAC4	CG7911	0.25	1	0	1.17	1.64	0	0.68	0	1	0	0	1	2	1	0	0	0	0	0
Q9VF08	blp	0	1	0	0	1.64	0	0.68	0	0	0	0	0	1	2	1	0	0	0	0
P31009	RpS2	11.25	8	3	2.42	1.63	0.64	0.57	8	14	11	12	10	10	2	10	2	1	1	8
Q0E8X7	CG30415	0.25	1	0	1.17	1.63	0	0.68	0	1	0	0	1	1	0	2	0	0	0	0
Q9VR80	CG17068	0.25	1	0	1.21	1.63	0	0.47	1	0	0	0	0	0	1	3	0	0	0	0
Q95WY3	Nop56	1.75	2.5	0.75	1.35	1.62	0.34	0.65	0	2	3	2	4	3	2	1	0	0	0	3
Q9VTW6	CG10418	2	1.5	0.25	1.97	1.62	0.62	0.62	0	2	4	2	2	1	0	3	0	0	0	1
Q9W392	CG7033	1.5	1	0	2.08	1.62	0.83	0.68	1	2	1	2	1	2	0	1	0	0	0	0
Q9VA91	RpS7	5.75	6.25	2.25	1.71	1.61	0.31	0.49	7	9	4	3	4	9	4	8	2	1	0	6
A1ZBG0	CG18605	0.5	1	0	1.34	1.6	0	0.47	0	1	1	0	1	3	0	0	0	0	0	0
P08182	CkIIbeta	11.75	18.5	7	1.22	1.6	0	0.56	13	9	11	14	9	24	17	24	5	8	5	10
P25161	Rpn3	1	6	2.25	0.54	1.6	0	0.44	0	2	2	0	9	5	5	5	1	2	1	5
Q0E8G6	CG3689	9.5	11.5	4.25	1.52	1.6	0.06	0.48	9	9	11	9	8	14	10	14	0	5	5	7
Q9VN39	CG9775	3.75	2.75	0.75	2.19	1.6	0.67	0.56	2	3	4	6	2	6	2	1	1	0	0	2
Q9VND8	Rheb	0	1	0	0	1.6	0	0.68	0	0	0	0	0	2	1	1	0	0	0	0
Q9W1V3	Fib	0	1	0	0	1.6	0	0.68	0	0	0	0	0	2	1	1	0	0	0	0
Q9W4A6	CG11473	0	1	0	0	1.6	0	0.68	0	0	0	0	0	2	1	1	0	0	0	0
Q26365-2	sesB	1	5.25	2	0.63	1.59	0	0.52	0	2	1	1	3	6	4	8	0	0	0	8
Q59E33	scaf6	1	1	0	1.73	1.59	0	0.47	1	1	1	1	0	3	1	0	0	0	0	0
Q8IMV6	Saf-B	0.25	1.5	0.25	0.97	1.59	0	0.71	0	0	0	1	1	3	1	1	0	0	0	1
P12613	T-cp1	2.25	6	2.25	0.86	1.58	0	0.56	3	2	1	3	9	6	2	7	1	2	1	5
Q9VM69	nop5	7.25	8	3	1.58	1.58	0.22	0.6	6	7	8	8	9	8	9	6	4	2	2	4
P29845	Hsc70-5	16.5	14	5.75	2.08	1.57	0.28	0.36	14	21	19	12	10	20	7	19	0	4	2	17
Q9VNA3	CG11999	0.5	1.5	0.25	1.11	1.57	0	0.62	0	1	0	1	0	2	1	3	0	0	0	1
Q9V3B6	c12.1	0.75	1	0	1.51	1.56	0.41	0.25	0	1	2	0	0	4	0	0	0	0	0	0
Q9VN44	Karybeta3	0.5	1.5	0.25	1.13	1.56	0	0.47	1	0	1	0	0	2	0	4	0	0	0	1
Q9VNI8	Hpr1	16.5	13	5.25	2.17	1.56	0.42	0.25	9	18	24	15	11	23	10	8	5	4	0	12
Q9XZT1	MED18	1	2	0.5	1.23	1.56	0.26	0.62	2	2	0	0	0	3	2	3	0	0	0	2
P48809	Hrb27C	0.75	2	0.5	1.07	1.55	0.19	0.61	0	0	1	2	0	4	2	2	0	0	0	2
Q8I0G5-2	gammaCop	0	2	0.5	0	1.55	0	0.57	0	0	0	0	1	3	0	4	0	0	0	2
P49847	Taf6	8	10.75	4.25	1.3	1.53	0.04	0.32	3	9	10	10	8	14	11	10	2	1	5	9
Q9VWY6	Taf8	14.25	17	7	1.45	1.53	0.06	0.28	14	14	12	17	15	15	15	23	6	6	5	11
Q9W5R8	RpL5	15.25	15.75	6.5	1.65	1.52	0.15	0.28	13	14	19	15	12	19	16	16	6	6	3	11
Q7K0D3	CG12909	0.75	2	0.5	1.01	1.51	0.17	0.68	0	2	1	0	2	3	1	2	0	0	1	1
Q9VDS6	Surf6	0.25	1.25	0.25	0.97	1.51	0	0.68	0	0	0	1	2	1	1	1	0	0	0	1
Q9VE17	snRNP-U1-C	2.25	2.5	0.75	1.56	1.51	0.36	0.61	2	2	3	2	1	4	2	3	0	1	0	2
Q9VH79	Rpt3R	1.5	5.5	2.25	0.69	1.51	0	0.41	2	2	0	2	7	5	4	6	2	1	0	6
A1Z7V1	brp	0	1.5	0.25	0	1.5	0	0.56	0	0	0	0	0	4	1	1	1	0	0	0
P48598	eIF-4E	3.25	5.25	2	1.17	1.5	0.08	0.4	1	4	4	4	3	10	3	5	0	1	1	6
Q9V3L6	Cbp20	1.75	0.75	0	2.22	1.5	0.72	0	0	2	3	2	1	1	1	0	0	0	0	0
Q9W1X7	MED23	2	2.5	0.75	1.47	1.5	0.32	0.57	2	1	1	4	0	3	2	5	0	1	0	2
Q9XY35	ox	0	1.75	0.5	0	1.5	0	0.68	0	0	0	0	2	2	2	1	0	0	0	2
O76857	BCL7-like	1.5	1.75	0.5	1.43	1.49	0.38	0.68	0	2	2	2	2	2	1	2	0	0	0	2
P29327	RpS6	4.25	3.75	1.25	1.86	1.49	0.52	0.53	3	6	4	4	2	7	0	6	1	0	1	3
Q9VHI4	CG11985	1.25	1.25	0.25	1.54	1.49	0.47	0.6	0	1	2	2	1	2	2	0	0	0	0	1
Q9VT61	CG8108	1.5	2	0.5	1.36	1.49	0.36	0.52	0	2	3	1	1	5	2	0	0	0	1	1
Q9VUB5	upSET	4.25	6.5	2.5	1.18	1.49	0.06	0.51	2	5	4	6	4	8	5	9	2	1	2	5
Q9W0P3	MED30	0.25	0.75	0	1.17	1.49	0	0.46	0	1	0	0	1	0	0	2	0	0	0	0
P02518	Hsp27	20.75	28	11.75	1.25	1.48	0	0.38	17	26	23	17	24	35	23	30	9	13	11	14
P29310	14-3-3zeta	6.25	9	3.5	1.23	1.48	0.03	0.42	6	8	5	6	7	13	7	9	3	3	4	4
P32100	RpL7	17	16	6.75	1.74	1.48	0.44	0.3	13	17	19	19	15	20	13	16	7	6	4	10
P48555	Rala	1	0.75	0	1.69	1.48	0.59	0.46	0	1	2	1	0	1	2	0	0	0	0	0
Q00168-2	CaMKII	0.25	0.75	0	1.18	1.48	0	0.46	0	0	0	1	0	1	2	0	0	0	0	0
Q02926-2	Rb97D	0.25	0.75	0	1.17	1.48	0	0.46	0	1	0	0	0	1	2	0	0	0	0	0
Q7K7W5	adp	0.75	0.75	0	1.58	1.48	0.41	0	2	0	1	0	1	1	0	1	0	0	0	0
Q9VHI6	CG11983	0.25	1.25	0.25	0.97	1.48	0	0.6	0	1	0	0	0	1	2	2	0	0	0	1
Q9VRM6	l(3)psg2	0.25	0.75	0	1.17	1.48	0	0.46	0	1	0	0	0	1	2	0	0	0	0	0
Q9I7K0-5	Jupiter	0.5	2	0.5	0.9	1.47	0	0.6	0	1	0	1	0	4	2	2	0	0	1	1
M9PHF9	CG12493	2	1.75	0.5	1.67	1.46	0.49	0.64	0	3	3	2	1	3	1	2	0	0	0	2
Q7KUA4	Uba2	0.25	0.75	0	1.17	1.46	0	0.46	0	1	0	0	1	2	0	0	0	0	0	0
Q9VE52	CstF-64	43.75	56.75	24.25	1.3	1.46	0	0.5	38	56	43	38	31	64	38	94	20	23	22	32
Q9VI63	Alh	0	1.25	0.25	0	1.46	0	0.6	0	0	0	0	0	2	2	1	0	0	0	1
Q9XZ61	Uch-L5	2	6.75	2.75	0.67	1.46	0	0.39	1	2	2	3	5	7	7	8	2	5	0	4
O62530	AP-2mu	0.25	0.75	0	1.17	1.45	0	0.46	0	0	1	0	0	2	1	0	0	0	0	0
O77430	skpA	4	4.25	1.75	1.5	1.45	0.21	0.46	3	5	4	4	4	4	4	5	2	0	0	5
Q0E965	SRPK	4	3.75	1.5	1.62	1.45	0.36	0.45	0	1	10	5	5	8	2	0	1	0	0	5
Q7JVL3	Prp38	1.25	0.75	0	1.87	1.45	0.65	0.46	0	2	2	1	0	2	1	0	0	0	0	0
Q9VHT2	tex	4.75	5.5	2.25	1.42	1.45	0.13	0.45	4	4	5	6	5	8	6	3	2	3	0	4
P05205	Su(var)205	2.5	3.5	1.25	1.27	1.44	0.14	0.5	2	3	2	3	2	6	4	2	0	2	1	2
Q9VNE9	RpL13A	7.25	6.25	2.5	1.75	1.44	0.48	0.47	4	6	11	8	7	7	6	5	2	2	3	3
O76927-2	RpS21	7.5	8	3.5	1.49	1.43	0.08	0.24	5	8	9	8	8	10	6	8	1	3	2	8
P36241	RpL19	9.75	7.25	3	2.02	1.43	0.63	0.44	5	9	15	10	7	9	5	8	3	4	1	4
Q9U5W9	Taf10	0.5	0.75	0	1.34	1.43	0	0.46	0	1	1	0	0	2	0	1	0	0	0	0
Q9V5Q4	Syf2	0.75	0.75	0	1.52	1.43	0.41	0.46	0	2	1	0	0	2	0	1	0	0	0	0
Q9W0S9	DIP2	0.5	1.25	0.25	1.05	1.43	0	0.68	0	1	1	0	2	1	1	1	0	0	1	0
Q9W4K1	rb	11.5	18.5	8	1.04	1.43	0	0.47	6	12	14	14	15	22	13	24	7	6	7	12
P06742-2	Mlc1	1.5	2.25	0.75	1.22	1.42	0.21	0.58	1	1	1	3	1	3	3	2	0	0	1	2
Q6IKG0	CG34301	0.25	3	1	0.58	1.42	0	0.44	1	0	0	0	1	1	4	6	0	0	3	1
Q9V3G1	RpL8	12.5	12.5	5.5	1.57	1.42	0.21	0.17	10	14	15	11	11	13	13	13	5	6	3	8
P08736	Ef1alpha48D	11.75	19.25	8.5	1.01	1.41	0	0.17	11	15	11	10	13	25	20	19	5	5	10	14
P17886	crn	8.75	5.5	2.25	2.36	1.4	0.62	0.32	7	12	11	5	2	12	3	5	1	3	0	5
P50882	RpL9	8.75	10	4.5	1.36	1.4	0.23	0.21	5	6	10	14	11	11	10	8	3	6	2	7
Q7KTV5	Nopp140	1.5	3.25	1.25	0.94	1.4	0.03	0.5	1	2	1	2	3	3	4	3	1	1	1	2
Q9I7L8	Cdc23	0	1.25	0.25	0	1.4	0	0.68	0	0	0	0	1	1	1	2	0	0	1	0
Q9VQJ6	CG9641	7.75	6.5	2.75	1.85	1.4	0.35	0.44	7	13	4	7	4	10	3	9	2	2	1	6
A8DYI7	l(2)03709	0	1.5	0.5	0	1.38	0	0.61	0	0	0	0	1	1	2	2	0	0	0	2
O18388	Fs(2)Ket	5.25	8.75	4	1	1.38	0.01	0.26	3	7	8	3	7	9	4	15	3	3	1	9
Q94920	porin	0	3	1.25	0	1.38	0	0.48	0	0	0	0	1	4	2	5	0	0	0	5
Q9V3U2	NHP2	13.25	14.5	6.5	1.42	1.38	0.1	0.25	11	17	11	14	12	13	14	19	8	7	4	7
Q9VNG2	CG1109	11.75	20	9	0.96	1.37	0	0.49	9	16	12	10	13	26	12	29	8	6	8	14
E1JIH4	CG8478	3.75	6.25	2.75	0.97	1.36	0.01	0.37	2	5	4	4	10	7	4	4	3	2	3	3
Q94518	Nacalpha	2.75	5.25	2.25	0.92	1.36	0.01	0.34	2	3	4	2	4	5	7	5	0	1	4	4
Q9VAN6	Slbp	3.5	5.25	2.25	1.09	1.36	0.02	0.51	4	3	3	4	6	6	8	1	0	2	4	3
Q9VPN5	Hop	2	3.75	1.5	0.99	1.36	0.09	0.48	4	2	1	1	4	4	4	3	0	1	3	2
Q9W0M4	CG13887	0	1	0.25	0	1.36	0	0.4	0	0	0	0	1	0	0	3	0	0	0	1
P84051	His2A	0.75	1.25	0.25	1.18	1.35	0.28	0.4	0	1	2	0	0	4	1	0	0	0	1	0
Q7JVY0	coro	6.25	4.75	2	1.91	1.35	0.55	0.3	6	5	8	6	1	4	2	12	2	1	1	4
Q8IPE8	Mtpalpha	5.75	16	8	0.62	1.35	0	0.02	4	5	7	7	11	20	14	19	4	4	1	23
Q9V8R9	cora	2.75	3.75	1.5	1.21	1.35	0.09	0.42	3	3	3	2	2	7	4	2	2	1	1	2
M9PCC3	MED20	1	2	0.75	1.03	1.34	0.18	0.5	0	3	1	0	0	3	1	4	0	0	0	3
Q9VJE1	CG5043	6.5	8.25	3.75	1.22	1.34	0.05	0.31	4	5	8	9	6	9	7	11	4	5	1	5
Q9VYW4	CG1703	0.75	0.5	0	1.52	1.34	0.41	0.25	0	2	1	0	0	0	2	0	0	0	0	0
Q9W1I2	bgcn	3	0.5	0	3.15	1.34	0.97	0	2	2	5	3	1	0	0	1	0	0	0	0
M9NFL1	eIF5B	1.5	1.75	0.5	1.35	1.33	0.36	0.43	1	3	0	2	0	5	2	0	0	1	1	0
P02517	Hsp26	11.25	15.25	7	1.13	1.33	0.01	0.24	8	16	13	8	12	20	14	15	6	7	7	8
P82147-2	l(2)efl	0.75	0.5	0	1.54	1.33	0.25	0	0	0	0	3	0	0	1	1	0	0	0	0
Q9VC60	CG13625	3.5	4.25	1.75	1.25	1.33	0.14	0.42	3	3	3	5	4	4	5	4	1	2	3	1
Q9VVG4	sec3	1	1	0.25	1.43	1.33	0	0.53	1	1	1	1	0	1	1	2	0	0	0	1
Q9W2X6	l(1)G0230	0	1	0.25	0	1.33	0	0.53	0	0	0	0	0	1	1	2	0	0	0	1
M9MSL3	Hsc70Cb	13.75	9	4.25	2.14	1.32	0.51	0.26	5	16	22	12	9	17	3	7	5	2	1	9
Q9VAM8	CG14508	0	1	0.25	0	1.32	0	0.4	0	0	0	0	1	3	0	0	0	0	0	1
Q9W5W8	CG9577	1.25	1	0.25	1.59	1.32	0.34	0.53	1	0	0	4	0	2	1	1	0	0	0	1
P36872	tws	0.75	0.5	0	1.52	1.31	0.41	0.25	0	2	1	0	0	0	0	2	0	0	0	0
M9NFR5	yps	1.25	1.5	0.5	1.27	1.3	0.28	0.5	0	2	2	1	0	3	2	1	1	0	0	1
O46067	EG:25E8.1	0.25	1	0.25	0.99	1.29	0	0.4	1	0	0	0	0	3	0	1	0	0	0	1
P04359	RpL32	5.75	6.25	3	1.31	1.29	0.1	0.15	4	6	8	5	6	6	6	7	2	3	2	5
P13060	Ef2b	27	25	12.5	1.55	1.29	0	0	19	27	34	28	19	31	29	21	7	10	11	22
Q27268	Hel25E	5.5	4	1.75	1.83	1.29	0.49	0.45	6	5	5	6	5	6	1	4	2	4	0	1
Q9NJH0	Ef1gamma	2.5	2.75	1.25	1.37	1.29	0.24	0.41	3	2	3	2	1	4	0	6	0	0	0	5
Q9W0P8	MED14	6.75	8.75	4.25	1.13	1.29	0.01	0.26	4	9	7	7	9	7	6	13	4	5	2	6
Q7K180	Map60	2	0.5	0	2.37	1.28	0.5	0.25	0	5	3	0	0	2	0	0	0	0	0	0
Q94527-2	Rel	0.5	0.5	0	1.35	1.28	0	0.25	0	0	1	1	0	2	0	0	0	0	0	0
Q9VAC7	CG15525-RA	0.75	1	0.25	1.21	1.28	0.28	0.4	0	2	1	0	1	3	0	0	0	1	0	0
Q9VT91	can	0.75	0.5	0	1.52	1.28	0.41	0.25	0	2	0	1	0	2	0	0	0	0	0	0
O16043	Df31	2	2.25	1	1.29	1.27	0.24	0.23	0	5	1	2	1	6	1	1	0	0	0	4
Q8IRD3	PHGPx	0.25	1	0.25	0.92	1.27	0	0.53	0	0	0	1	1	1	0	2	0	0	1	0
Q9U3Z7	hoip	2.75	2.75	1.25	1.4	1.27	0.21	0.36	4	2	2	3	3	3	2	3	0	1	1	3
Q9VSR5	mRpL12	3.75	5.5	2.5	1.07	1.27	0.05	0.42	3	6	3	3	2	8	5	7	4	2	1	3
Q9W237	RpS16	2.75	3.75	1.75	1.14	1.27	0.1	0.39	2	5	2	2	3	6	1	5	1	2	0	4
B7YZX6	CG10600	0	1	0.25	0	1.26	0	0.53	0	0	0	0	0	1	1	2	0	0	1	0
P07487	Gapdh2	1	3.75	1.75	0.67	1.26	0	0.36	2	0	1	1	2	5	3	5	1	1	1	4
P48610-3	Argk	3.25	7.75	3.75	0.72	1.26	0	0.26	3	2	3	5	7	12	5	7	1	4	4	6
P55830	RpS3A	7	5.5	2.75	1.74	1.26	0.27	0.34	6	11	7	4	2	9	3	8	2	1	0	8
P38979	sta	20.25	20.75	10.75	1.36	1.25	0	0	18	21	22	20	22	21	19	21	9	15	5	14
Q06559	RpS3	18.25	18.5	9.5	1.37	1.25	0	0.01	14	21	20	18	18	21	15	20	9	9	6	14
Q9VAJ2	Bub3	0	1	0.25	0	1.25	0	0.4	0	0	0	0	0	3	0	1	0	1	0	0
P41093	RpL18A	10	8.5	4.25	1.56	1.24	0.26	0.05	7	10	12	11	8	9	8	9	3	5	4	5
Q9W2D9	CG10306	0.5	1.75	0.75	0.82	1.24	0	0.46	0	1	0	1	0	4	1	2	0	0	0	3
O62621	beta'Cop	0	0.75	0.25	0	1.23	0	0.38	0	0	0	0	0	0	2	1	0	0	0	1
Q9V9Z8	CG15561	6.5	7.5	3.75	1.18	1.23	0.02	0.12	4	7	7	8	8	7	9	6	3	3	5	4
Q9VTP4	RpL10Ab	8	9.75	5	1.14	1.23	0.01	0.15	5	11	9	7	8	13	10	8	5	3	4	8
Q9VTV1	thoc6	4.75	4	2	1.51	1.23	0.25	0.28	3	5	5	6	4	5	5	2	2	3	0	3
Q9VVU2	RpL26	8.25	7	3.5	1.57	1.23	0.24	0.22	6	8	10	9	5	10	6	7	3	2	3	6
Q9W0A8	RpL23A	9	9.25	4.75	1.31	1.23	0.01	0.03	7	10	10	9	10	9	9	9	6	4	3	6
A1Z8D0	nclb	1.25	1.25	0.5	1.27	1.22	0.28	0.47	0	2	1	2	1	2	1	1	1	0	0	1
Q06943	HmgZ	2.75	2.5	1.25	1.33	1.22	0.23	0.36	1	3	3	4	4	1	4	1	1	1	1	2
Q7K581	CG8963	0.75	0.75	0.25	1.25	1.22	0	0.38	0	1	1	1	0	0	1	2	0	0	0	1
Q9U9Q4	eIF-3p40	0.75	2	1	0.82	1.22	0.06	0.42	0	2	0	1	2	3	1	2	0	0	0	4
Q9VB14	RpS10a	2.25	1.25	0.5	1.87	1.22	0.52	0.4	3	4	0	2	0	2	0	3	0	0	0	2
Q9VGS2	Tctp	1	1.25	0.5	1.15	1.22	0	0.47	1	1	1	1	1	1	2	1	0	0	1	1
Q9XZT7	Taf10b	5.5	4.25	2	1.66	1.22	0.4	0.29	7	5	6	4	3	4	4	6	2	1	3	2
O97454	l(1)10Bb	3.25	2.75	1.25	1.5	1.21	0.29	0.37	4	3	3	3	2	4	2	3	1	2	1	1
Q9V5P6	CG7637	7	9.25	4.75	1.08	1.21	0.01	0.24	6	8	4	10	7	10	6	14	4	5	3	7
Q9VLT5	poe	10.75	48	25.5	0.35	1.21	0	0.01	14	10	10	9	24	47	39	82	16	43	9	34
O17445	RpL15	9.25	7.75	4	1.55	1.2	0.11	0.09	9	9	10	9	7	9	6	9	5	3	3	5
O44437	SmD3	2.5	1.75	0.75	1.58	1.2	0.45	0.43	1	3	3	3	1	2	1	3	0	1	1	1
P41042	RpS4	14.5	15.5	8.25	1.27	1.2	0.03	0.07	12	21	15	10	15	21	7	19	9	6	5	13
P54397	FK506-bp1	5.5	4.5	2.25	1.53	1.2	0.26	0.24	4	6	6	6	4	6	5	3	2	2	2	3
P55935	RpS9	8.5	8	4.25	1.38	1.2	0.1	0.08	5	11	9	9	8	10	6	8	5	3	2	7
Q7KMP8	Rpn9	3.75	8	4.25	0.72	1.2	0	0.06	3	4	3	5	9	9	5	9	3	4	3	7
Q9W0M1	CG13889	0.5	1.25	0.5	0.96	1.2	0.12	0.45	2	0	0	0	1	2	0	2	1	0	0	1
Q9W424	Spx	2	1.75	0.75	1.38	1.2	0.31	0.43	1	2	3	2	1	3	2	1	1	0	1	1
P19889	RpLP0	18.5	16.25	8.75	1.49	1.19	0.05	0	15	19	22	18	13	16	17	19	7	8	7	13
P55841	RpL14	8	7.25	3.75	1.44	1.19	0.06	0.12	8	7	8	9	8	9	5	7	5	1	4	5
A1Z9G2	CG6197-RA	12.5	11.75	6.5	1.37	1.18	0.01	0.01	9	10	16	15	11	14	13	9	11	5	1	9
P08570	RpLP1	15.5	14	7.5	1.44	1.18	0.07	0.02	13	13	17	19	15	17	14	10	7	9	6	8
P22468	gdl	1.5	2	1	1.08	1.18	0.09	0.42	1	2	2	1	3	3	0	2	0	0	1	3
P46223	RpL7A	9.75	8.25	4.5	1.48	1.18	0.07	0.04	8	10	11	10	10	7	8	8	6	3	3	6
Q9VFH6	CG7886	1	1.25	0.5	1.18	1.18	0.24	0.4	1	3	0	0	0	3	0	2	0	1	0	1
Q9VNG0	MED27	1	0.75	0.25	1.42	1.18	0.33	0.38	1	3	0	0	0	2	0	1	0	0	0	1
Q9W3N1	CG1444	0.25	3.5	2	0.43	1.18	0	0.24	0	0	0	1	4	5	3	2	1	0	0	7
P08181	CkIIalpha	22	26.75	14.5	1.09	1.17	0	0.01	16	24	26	22	20	28	25	34	11	15	14	18
Q960Y8	alt	0.25	0.75	0.25	0.97	1.17	0	0.24	0	1	0	0	0	3	0	0	0	0	0	1
Q9GYV9	MED7	0.75	1	0.5	1.07	1.17	0.19	0.37	0	0	1	2	2	0	0	2	0	0	0	2
Q9VS38	MED4	6	6	3.25	1.28	1.17	0.05	0.07	7	7	7	3	6	5	6	7	3	2	3	5
P29844	Hsc70-3	35.75	42.5	23.75	1.09	1.16	0	0	30	37	39	37	43	46	42	39	22	23	19	31
Q86B73	Doa	0.75	1.25	0.5	0.99	1.16	0	0.47	0	1	1	1	1	2	1	1	1	0	1	0
Q9V9M7	RpL21	4	4.25	2.25	1.23	1.16	0.05	0.29	3	4	5	4	3	6	2	6	2	2	1	4
Q9V9W2	RpL6	5.5	4.75	2.5	1.42	1.16	0.17	0.15	4	6	7	5	4	6	5	4	3	2	2	3
Q9VZE4	CG1316	1.5	3	1.75	0.82	1.16	0.02	0.35	0	2	2	2	1	5	5	1	0	0	0	7
E1JHY7	Pop2	1.25	0.25	0	1.87	1.15	0.65	0	0	2	2	1	0	0	0	1	0	0	0	0
Q05547	Pp1-13C	28.25	33.5	18.25	1.11	1.15	0	0	26	23	30	34	27	36	29	42	15	17	22	19
Q9VUN2	CG7804	0.75	1	0.5	1.09	1.15	0.19	0.42	1	2	0	0	1	2	1	0	0	0	0	2
Q9W1T1	RpL22-like	3.25	1	0.5	2.3	1.15	0.69	0.42	1	4	5	3	0	1	2	1	0	0	0	2
A1Z840	cdc2rk	5.5	3.5	2	1.81	1.14	0.32	0.25	5	10	3	4	3	9	2	0	1	0	0	7
A1Z9G9	CG6220	0.5	1	0.5	0.94	1.14	0	0.42	0	1	1	0	1	1	0	2	0	0	0	2
Q8MSA8	mtsh	1.25	0.25	0	1.86	1.14	0.6	0	0	1	3	1	0	1	0	0	0	0	0	0
Q9V3F3	mTTF	0.75	0.25	0	1.52	1.14	0.41	0	0	2	1	0	0	1	0	0	0	0	0	0
Q9V455	Kap-alpha3	4.5	5	2.75	1.21	1.14	0.04	0.34	4	5	6	3	1	9	2	8	1	1	1	8
Q9V4F9	MED26	3.25	4.25	2.25	1.05	1.14	0.02	0.26	3	4	3	3	1	3	2	11	3	0	2	4
Q9VN86	CG2604	0	1.75	1	0	1.14	0	0.36	0	0	0	0	0	1	3	3	0	0	0	4
Q9VP57	pzg	0.75	0.25	0	1.51	1.14	0.41	0	0	1	2	0	0	1	0	0	0	0	0	0
Q9W3M7	CG10777	0.75	1	0.5	1.06	1.14	0.18	0.37	0	3	0	0	0	2	2	0	0	0	0	2
P02299	His3	3.75	4.5	2.25	1.09	1.13	0.17	0.31	2	7	2	4	2	8	5	3	3	1	4	1
P20432	GstD1	0	1	0.5	0	1.13	0	0.42	0	0	0	0	1	2	0	1	0	0	0	2
P23226-2	Map205	0.75	1	0.5	1.09	1.13	0	0.42	1	0	1	1	0	1	1	2	0	0	0	2
P49905-2	Taf12	1.75	2	1	1.11	1.13	0.13	0.31	1	2	1	3	2	2	2	2	0	1	2	1
Q9VEP9	CG16941	0.25	0.75	0.25	0.96	1.13	0	0.24	1	0	0	0	0	3	0	0	1	0	0	0
Q7K1V1	CG8441	7.25	6.25	3.5	1.39	1.12	0.06	0.04	7	8	8	6	6	7	7	5	3	4	3	4
Q7KSU6	CG8036	1.75	2.25	1.25	1.04	1.12	0.14	0.29	1	2	0	4	3	4	1	1	0	1	1	3
Q9VIS0	CG10466	2.5	2.5	1.25	1.2	1.12	0.14	0.3	2	3	2	3	2	2	3	3	1	2	2	0
M9NDX8	Spn	117	146	82.5	1.01	1.11	0	0	116	108	136	108	121	149	131	183	83	81	93	73
Q86BM5	Akap200	0	1.5	0.75	0	1.11	0	0.36	0	0	0	0	2	2	1	1	0	0	2	1
Q8MSC4	CG3509	1.75	1	0.5	1.51	1.11	0.4	0.37	0	4	1	2	1	2	1	0	1	0	0	1
Q9VLV5	SmE	5.25	5.75	3.25	1.12	1.11	0.05	0.06	3	5	8	5	6	7	5	5	2	2	4	5
Q9VV52	RAF2	3.75	5	2.75	0.98	1.11	0.01	0.25	3	5	4	3	2	6	8	4	4	3	2	2
Q9W0S7	Tudor-SN	0.25	1	0.5	0.82	1.11	0	0.34	0	0	1	0	0	3	1	0	0	0	0	2
Q2PDP6	CG12877-RC	3	5	2.75	0.83	1.1	0	0.25	2	2	4	4	2	4	7	7	3	3	3	2
Q9VF03	mor	29.75	28	16.75	1.3	1.1	0	0.01	9	39	45	26	27	51	10	24	22	7	4	34
Q9VUJ4	Rpn12R	0.25	2	1	0.61	1.1	0	0.41	1	0	0	0	0	4	0	4	0	3	0	1
Q9VWA8	CG6480	1.25	1.75	1	0.99	1.1	0.15	0.26	0	2	0	3	1	3	1	2	1	0	0	3
Q3YMU0	ERp60	0.25	1	0.5	0.82	1.09	0	0.24	0	1	0	0	0	4	0	0	0	0	0	2
Q7JZW2	RpS15	2.25	2.25	1.25	1.2	1.09	0.12	0.26	2	3	3	1	2	5	1	1	1	0	1	3
Q9VPL0	CG3436	20.25	20.75	12.25	1.17	1.09	0	0	15	18	28	20	22	20	18	23	9	16	11	13
P22769	Pros28.1	0.75	2	1.25	0.72	1.08	0	0.19	1	1	0	1	2	1	3	2	1	1	0	3
P41126	RpL13	7	7	4	1.19	1.08	0.06	0.06	4	7	7	10	6	9	5	8	4	4	4	4
Q8MSX2	MED6	0.5	0.5	0.25	1.13	1.08	0	0.22	1	0	1	0	0	0	0	2	0	0	0	1
A1Z8X3	ana3	5.25	3	1.75	1.8	1.07	0.49	0.31	2	7	7	5	1	5	1	5	2	1	0	4
A1ZB48	CG14500	1.5	1.75	1	1.09	1.07	0.1	0.24	3	1	1	1	1	2	2	2	1	0	1	2
P48588	RpS25	3.25	3	1.75	1.23	1.07	0.08	0.15	3	4	3	3	3	4	2	3	2	2	1	2
Q7K2G1	Rpn13	2.75	8.5	5.25	0.51	1.07	0	0.01	4	1	5	1	7	11	7	9	1	6	3	11
Q9V3P3	REG	2	1.75	1	1.23	1.07	0.17	0.24	1	2	3	2	1	2	2	2	1	0	1	2
Q9VSG1	eIF4E-3	2.5	2.25	1.5	1.21	1.07	0.11	0.24	2	3	2	3	3	1	1	4	0	1	0	5
Q9W3Z5	CG3918	0	2.5	1.5	0	1.07	0	0.19	0	0	0	0	4	2	2	2	2	1	1	2
A1ZBB4	CG30122	0	1	0.5	0	1.06	0	0.32	0	0	0	0	0	3	1	0	0	0	1	1
P08879	awd	1.25	2.5	1.5	0.81	1.06	0.04	0.24	2	0	0	3	2	4	1	3	0	0	2	4
P41094	RpS18	3.5	3.25	2	1.21	1.06	0.07	0.11	3	5	3	3	4	4	2	3	0	2	2	4
Q9VDG2	Rlip	4.5	6.5	4	0.86	1.06	0	0.02	3	6	4	5	5	6	8	7	3	2	4	7
E2QCS8	tho2	2.5	3.5	2	0.89	1.05	0.06	0.25	0	2	5	3	3	6	4	1	1	1	4	2
Q7KNF2	Pabp2	1.25	0.5	0.25	1.53	1.05	0.42	0.22	0	3	2	0	0	2	0	0	0	0	0	1
Q8IMW5	mld	0.25	2	1.25	0.54	1.05	0	0.21	0	1	0	0	2	3	1	2	2	0	0	3
Q9V3G3	cyp33	6	6.5	4	1.1	1.05	0	0.05	6	6	5	7	7	9	5	5	6	4	1	5
Q9VS34	RpL18	5.5	4.25	2.5	1.42	1.05	0.25	0.13	4	5	9	4	3	6	3	5	2	3	2	3
P39736	Bx42	0.75	0.5	0.25	1.18	1.04	0.23	0	0	0	3	0	1	0	0	1	0	0	1	0
Q9V3G7	Rpn7	2.25	5.5	3.5	0.61	1.04	0	0.06	2	2	1	4	5	6	3	8	3	2	2	7
O96863	CkIIbeta2	2.5	2	1.25	1.3	1.03	0.16	0.28	2	3	3	2	0	3	2	3	2	0	0	3
P35600	Gnf1	0.25	1.75	1	0.58	1.03	0	0.32	0	1	0	0	0	3	2	2	1	1	1	1
P84040	His4	6	6.5	4	1.05	1.03	0	0.05	5	7	7	5	5	7	9	5	4	1	6	5
Q9V453	CG3491	1.75	1.5	1	1.16	1.03	0.2	0.26	0	4	2	1	1	3	2	0	1	0	0	3
Q9VI10	SmD2	4.25	3.25	1.75	1.42	1.03	0.35	0.28	1	5	9	2	0	9	1	3	1	1	3	2
A8JQW3	Pnn	2.25	2.75	1.75	0.96	1.02	0.05	0.22	1	3	4	1	3	5	3	0	3	0	1	3
M9PHD8	Trf2	2.25	3.25	2	0.88	1.02	0.01	0.2	2	2	3	2	2	6	3	2	1	2	2	3
O44081	Nop60B	38.25	46.25	29.25	0.95	1.02	0	0	34	46	30	43	37	47	45	56	27	28	26	36
P54357	Mlc-c	8.5	9.5	6	1.03	1.02	0	0	8	9	9	8	8	11	8	11	5	4	6	9
Q7KV35	CG33235	3.5	3.5	2.25	1.09	1.02	0.06	0.07	1	5	3	5	3	4	4	3	1	0	3	5
Q9GYU7	MED10	2	3	2	0.86	1.02	0.01	0.11	1	2	2	3	2	4	2	4	2	1	0	5
Q9VAY9	mRpS22	1.75	1.5	1	1.21	1.02	0.19	0.26	2	3	0	2	1	2	0	3	0	1	0	3
Q9VU02	SmD1	5.5	6.75	4.25	0.94	1.02	0	0.01	4	4	7	7	7	6	7	7	4	1	6	6
Q9W334	RpS28b	1.25	1.25	0.75	1.08	1.02	0.14	0.29	1	2	1	1	1	2	1	1	1	0	1	1
Q9VK90	CG5446	0.25	0.75	0.5	0.78	1.01	0	0.28	0	1	0	0	2	0	0	1	1	1	0	0
Q9VX91	UBR1	0.5	0.75	0.5	0.91	1.01	0	0.3	1	1	0	0	2	0	0	1	0	2	0	0
A1ZAX1	eIF3-S8	0.75	1.75	1.25	0.74	1	0.03	0.3	0	1	0	2	0	3	2	2	0	0	0	5
P28750	exu	19.75	18.25	12.25	1.2	1	0	0	14	25	22	18	14	26	16	17	9	8	6	26
Q8INM3-2	sle	2	2.5	1.75	0.91	1	0.02	0.12	1	3	2	2	4	2	2	2	2	0	1	4
Q94524	Dlc90F	2	1.5	1	1.2	1	0.2	0.16	1	4	2	1	2	1	2	1	1	1	1	1
Q9VGM5	CG14708	0	2	1.25	0	1	0	0.26	0	0	0	0	0	2	1	5	0	2	1	2
Q9VHV6	CG9667	0.75	0.75	0.5	1.07	1	0.19	0.3	0	0	2	1	0	2	0	1	0	0	0	2
Q9VLK2	CG13096	1	0.75	0.5	1.13	1	0.23	0	0	4	0	0	1	1	1	0	0	0	1	1
Q9VSH0	CG7194	3.75	3	2	1.26	1	0.06	0.13	3	4	4	4	2	3	5	2	2	2	1	3
Q9VT38	CG18178	0.25	0.75	0.5	0.82	1	0	0.3	0	1	0	0	0	2	0	1	0	0	0	2
Q9VXW2	CG6227	7	8	5	0.99	1	0	0.14	2	9	9	8	5	13	8	6	5	2	6	7
Q9VYE3	CG15747-RA	20.75	20	13	1.14	1	0	0	19	22	20	22	21	22	20	17	16	13	10	13
P09180	RpL4	18.25	16.75	11	1.19	0.99	0.01	0	12	19	25	17	14	20	15	18	9	9	10	16
Q9W526	EG:67A9.2	4.5	6.5	4.25	0.8	0.99	0	0.14	4	4	5	5	4	6	11	5	2	4	6	5
P50887	RpL22	2.75	1.5	1	1.46	0.98	0.35	0.16	1	2	5	3	1	2	2	1	1	1	1	1
P53034	RfC4	0.5	0.75	0.5	0.9	0.98	0	0.28	0	1	1	0	1	2	0	0	0	0	1	1
P55824-3	faf	0	1	0.75	0	0.98	0	0.31	0	0	0	0	0	2	1	1	0	0	0	3
Q9V4E0	CG1970-RA	2.25	3.25	2.25	0.83	0.98	0.01	0.14	0	4	2	3	2	6	3	2	2	2	0	5
Q9VAY6	BCAS2	4	4	2.75	1.08	0.98	0.01	0.02	4	3	4	5	4	5	3	4	3	2	1	5
Q9VXE0	SmG	8.25	9	5.75	0.99	0.98	0	0	7	8	10	8	9	8	10	9	6	5	9	3
Q9VAY2	Gp93	0	3.75	2.5	0	0.97	0	0.07	0	0	0	0	2	5	3	5	0	3	3	4
Q9VPC0	Pitslre	3.25	6.5	4.25	0.62	0.97	0	0.02	2	5	4	2	5	7	9	5	2	4	7	4
Q9VYQ9	Tango4	3.25	0.75	0.5	2.11	0.97	0.7	0.22	2	4	5	2	0	0	3	0	0	0	2	0
P11147	Hsc70-4	96.75	101.75	68.75	1.03	0.96	0	0	97	99	95	96	90	113	102	102	64	63	63	85
P49028	mago	5.25	6	4.25	0.96	0.96	0	0.04	4	5	5	7	5	10	6	3	5	2	1	9
Q03334	RpS13	1.5	1	0.75	1.26	0.96	0.28	0.28	1	3	2	0	0	3	0	1	0	0	0	3
Q7KLW9	Prp19	37.75	33.25	22.75	1.21	0.96	0	0	33	40	46	32	34	36	30	33	24	26	12	29
Q9V3P0	Jafrac1	4	3.75	2.5	1.11	0.96	0.03	0.03	5	5	3	3	4	4	3	4	3	2	3	2
Q9VNB9	RpL35A	3.5	3.25	2.25	1.09	0.96	0.03	0.04	2	4	4	4	3	4	3	3	3	2	1	3
L0MLI5	CG33978	0	0.75	0.5	0	0.95	0	0.28	0	0	0	0	1	2	0	0	1	0	1	0
O97428	cib	1	0.75	0.5	1.13	0.95	0.21	0.23	0	2	1	1	0	3	0	0	0	0	1	1
Q9VD52	CG6015	8.75	8	5.5	1.18	0.95	0.01	0.09	8	6	13	8	4	15	5	8	5	6	1	10
A1Z8U4	Cct5	1.25	2	1.5	0.78	0.94	0.01	0.07	1	1	1	2	2	2	2	2	0	2	1	3
O96676	CBP	5	6	4.25	0.89	0.94	0	0.01	5	5	4	6	5	7	8	4	2	9	2	4
P54399	Pdi	2	4.5	3.25	0.6	0.94	0	0.04	2	3	1	2	4	7	3	4	0	4	2	7
Q8INK3	fabp	0.5	0.25	0.25	1.16	0.94	0.19	0	2	0	0	0	0	1	0	0	0	0	0	1
Q9V3K3	rept	6.25	7	5	0.94	0.94	0	0	6	4	8	7	6	7	7	8	2	6	4	8
Q9VFJ1	CG8461	1.25	1.5	1.25	0.88	0.94	0.07	0.18	0	3	1	1	2	2	2	0	1	0	0	4
Q9VR21	Taf12L	0.75	0.25	0.25	1.27	0.94	0.23	0	0	0	0	3	0	1	0	0	0	0	0	1
O77410	eIF3-S6	1	2.25	1.75	0.67	0.93	0.01	0.18	0	1	1	2	0	4	2	3	0	1	0	6
Q9VHS8	eIF4AIII	33.25	28.25	20	1.21	0.93	0	0	28	35	38	32	23	30	31	29	21	27	9	23
Q9VJY6	RpL24	1.75	1.75	1.25	0.99	0.93	0.07	0.12	1	2	3	1	1	2	2	2	2	1	1	1
Q9VXK0	Nipsnap	0	0.5	0.5	0	0.93	0	0	0	0	0	0	0	0	1	1	0	0	0	2
Q9W0Q2	Cypl	3	2	1.5	1.28	0.93	0.19	0.07	2	2	3	5	2	2	2	2	2	1	1	2
Q9W2D0	CG4021	0.5	1.25	1	0.7	0.93	0	0.09	0	0	1	1	1	2	1	1	0	0	1	3
M9NGY4	ZAP3	0.5	1	0.75	0.78	0.92	0	0	1	0	0	1	1	1	1	1	0	0	2	1
O18332	Rab1	1.25	3	2.25	0.6	0.92	0	0.03	1	2	1	1	2	3	3	4	2	2	1	4
Q5BI50	Cul-4	0.25	0.5	0.5	0.82	0.92	0	0.19	0	1	0	0	0	0	0	2	0	0	0	2
Q8MLS0	CG13551	1.5	2.5	1.75	0.75	0.92	0.02	0.08	2	1	0	3	2	3	2	3	0	3	3	1
Q961D1	CycK	6.75	5.5	4	1.18	0.92	0.02	0.01	3	8	8	8	6	8	5	3	5	2	3	6
Q9N6D7	hrg	2	1.25	1	1.23	0.92	0.25	0.21	0	2	5	1	0	0	1	4	0	2	0	2
Q9VE51	Cpsf73	39.5	49	33.75	0.84	0.92	0	0	32	41	41	44	41	47	43	65	37	34	34	30
Q9VH64	CG8507	2.5	3.75	2.75	0.76	0.92	0	0.06	2	2	3	3	2	3	4	6	0	3	3	5
Q9VN31	Fip1	33.5	45.5	31.5	0.78	0.92	0	0	34	35	33	32	30	47	38	67	31	31	27	37
Q9VP40	sa	1.5	1.25	1	1.06	0.92	0.13	0.24	0	2	1	3	2	3	0	0	2	0	0	2
Q9W5P1	MED21	3.75	3.5	2.5	1.04	0.92	0.05	0.05	2	6	3	4	2	3	4	5	4	2	2	2
O77460	Nurf-38	0.25	0.5	0.5	0.81	0.91	0	0.18	1	0	0	0	2	0	0	0	0	0	1	1
P02283	His2B	1.5	1.25	1	1.03	0.91	0.07	0.08	1	2	2	1	1	1	2	1	1	1	1	1
P92177-4	14-3-3epsilon	11	13.75	9.75	0.85	0.91	0	0	12	12	10	10	10	19	11	15	9	10	8	12
Q0E940	eIF3-S9	0	0.5	0.5	0	0.91	0	0	0	0	0	0	0	1	0	1	0	0	0	2
Q24337	e(r)	3.5	3	2.25	1.11	0.91	0.02	0.04	3	4	4	3	2	4	2	4	3	1	1	4
Q7K012	Bap55	18.5	16.25	11.75	1.14	0.91	0	0	12	21	22	19	18	22	12	13	18	8	5	16
Q7KSN8	CG31368	33.5	29	21	1.18	0.91	0	0	27	33	40	34	28	40	21	27	34	20	1	29
Q9W1T9	CG9899	1.5	4.5	3.25	0.47	0.91	0	0.01	0	3	3	0	5	4	4	5	3	5	3	2
A1ZAK3	Dek	0.5	0.5	0.5	0.92	0.9	0	0.18	1	1	0	0	0	0	2	0	0	0	1	1
O02649	Hsp60	13.75	11.75	9	1.17	0.9	0	0	12	13	13	17	9	14	8	16	5	7	3	21
Q9V3D6	Cpsf100	49.25	61.75	43.75	0.81	0.9	0	0	44	56	49	48	51	65	55	76	45	46	42	42
Q9VLU0	baf	9.25	7.75	5.75	1.14	0.9	0	0	8	10	9	10	9	7	8	7	8	4	5	6
Q9VPV7	CG4415	2.5	3	2.25	0.84	0.9	0.01	0.05	2	4	1	3	4	3	4	1	2	1	4	2
O96827	Ef1beta	6.5	5.75	4.5	1.06	0.89	0	0	4	5	9	8	6	6	7	4	3	5	2	8
P40301	Pros25	0.5	1.75	1.5	0.55	0.89	0	0.09	0	1	1	0	3	2	2	0	0	2	1	3
P45594	tsr	2.75	2.5	1.75	1.04	0.89	0.06	0.13	2	3	4	2	2	4	1	3	1	1	4	1
Q7JVI3	Tango7	0.5	2	1.75	0.56	0.89	0	0.14	1	0	0	1	1	4	1	2	0	0	0	7
Q24297	SmF	2.25	3	2.25	0.78	0.88	0.03	0.1	0	2	5	2	0	4	5	3	0	3	3	3
Q8MSU4	Sym	79.5	98.25	70.75	0.81	0.88	0	0	79	82	72	85	82	96	75	140	75	75	66	67
Q9VBH8	RpL34a	1.75	1.5	1.25	1.01	0.87	0.05	0.11	1	2	2	2	1	3	1	1	1	1	1	2
Q9VHI1	hyx	16.5	23.25	16.75	0.72	0.87	0	0	14	20	15	17	16	29	17	31	12	12	23	20
Q9W019	CG15877	0.25	0.5	0.5	0.8	0.87	0	0.18	0	1	0	0	0	2	0	0	0	1	0	1
M9NDL7	Reps	4.5	5.25	4	0.84	0.86	0	0.01	2	8	4	4	2	5	6	8	3	1	6	6
P13008	RpS26	1.5	1.75	1.5	0.85	0.86	0.01	0.06	2	1	1	2	2	2	1	2	1	2	1	2
Q9VAP9	CG11873	16	16	12	0.98	0.86	0	0.03	6	31	18	9	10	35	6	13	17	6	4	21
Q9VN55	atms	28.5	37	27.5	0.75	0.86	0	0	28	28	29	29	29	37	37	45	25	31	29	25
Q9VVL6	MED19	4.75	5	4	0.9	0.86	0	0	4	6	4	5	6	5	3	6	3	3	4	6
Q9VZJ1	Dpy-30L2	0.25	0.75	0.75	0.72	0.86	0	0.18	1	0	0	0	0	1	0	2	0	1	0	2
Q8MLY8	RpS8	8	8.5	6.75	0.89	0.85	0	0	8	8	8	8	8	9	8	9	8	8	3	8
Q9VBN5	RpL27	4	3.75	3	0.95	0.85	0.01	0.01	2	5	5	4	3	4	4	4	3	3	3	3
Q9VYT5	CG10347	5	6.25	4.75	0.79	0.85	0	0.01	7	4	3	6	5	3	7	10	2	7	8	2
O02195	Trip1	0.75	0.75	0.75	0.91	0.84	0.09	0.18	1	0	0	2	0	1	0	2	0	0	1	2
Q9NFU0	Fmr1	1	1.25	1.25	0.84	0.84	0	0.15	1	1	1	1	0	3	1	1	0	0	0	5
Q9VP05	MED1	2.75	5.25	4.25	0.57	0.84	0	0	0	3	3	5	4	6	4	7	3	4	3	7
M9PHG2	Moe	0.25	2	2	0.43	0.83	0	0.1	0	0	0	1	1	3	4	0	1	0	0	7
Q7JXC4	P32	8.75	8.75	7	0.92	0.83	0	0	9	10	8	8	9	8	7	11	10	7	4	7
M9NF89	U2af50	15.25	14	10.75	1.02	0.82	0	0	21	13	12	15	11	16	14	15	8	13	15	7
Q9V726-2	Cpsf160	90.5	99.75	77.25	0.84	0.82	0	0	75	102	94	91	87	105	83	124	75	82	76	76
M9MRD4	Msp-300	5.25	5.75	4.5	0.84	0.81	0	0.01	6	0	7	8	3	5	6	9	10	3	5	0
P49630	RpL36	3.75	3.75	3.25	0.89	0.81	0	0	4	4	4	3	4	4	3	4	3	4	2	4
Q00725	Sgs4	1.25	1.5	1.5	0.77	0.81	0.01	0.06	1	2	1	1	3	1	1	1	2	1	1	2
Q9VJB0	elfless	1	0.25	0.5	1.16	0.81	0.21	0	0	2	1	1	1	0	0	0	0	1	0	1
Q9VKW3	RfC3	0.5	1	1	0.68	0.81	0	0	1	1	0	0	1	1	1	1	0	1	2	1
Q9W3Y5	CG14443	4.25	2.5	2.25	1.23	0.81	0.2	0.03	1	5	4	7	3	4	3	0	4	2	1	2
P35875	Parp	7.25	6	5.25	1	0.8	0	0	3	10	8	8	7	8	5	4	8	7	0	6
Q05856	SmB	5	5	4.25	0.89	0.8	0	0	5	6	6	3	4	7	4	5	6	4	2	5
Q0E8X9	yip3	1.25	1.25	1.25	0.85	0.8	0.02	0.08	1	2	1	1	0	1	2	2	2	0	1	2
Q24117	ctp	14.25	15.25	12.25	0.84	0.8	0	0	12	15	14	16	17	14	11	19	14	15	12	8
Q7YZA2	CG7065	1.75	1.75	1.75	0.86	0.8	0.01	0.11	1	2	2	2	1	4	2	0	0	1	1	5
Q86BK9	CG32971-RC	0.5	0.25	0.5	0.94	0.8	0	0	0	1	1	0	0	1	0	0	0	0	0	2
Q9VC56	CG5794	3	0.25	0.5	2.1	0.8	0.53	0	0	1	7	4	1	0	0	0	1	0	0	1
Q9VEX9	Bin1	5.75	6	5	0.86	0.8	0	0	6	4	7	6	5	9	7	3	3	7	5	5
Q9VG63	CG5509-RA	1.75	2	1.75	0.81	0.8	0.02	0.07	1	0	3	3	0	3	2	3	0	2	3	2
Q9VKP5	CG6700	1.5	2.25	2	0.69	0.8	0.01	0.13	2	1	0	3	1	3	5	0	2	3	2	1
Q9XZJ4	Prosalpha1	0.5	0.75	1	0.74	0.8	0	0	1	1	0	0	1	1	0	1	0	0	0	4
A1ZBJ2	CG7461	0	1.5	1.75	0	0.79	0	0.13	0	0	0	0	0	0	3	3	0	0	0	7
P21187	pAbp	9.5	10	8.5	0.86	0.79	0	0	10	10	9	9	6	11	8	15	5	6	7	16
Q94546	Atu	9	11.25	9.25	0.72	0.79	0	0	10	10	9	7	15	10	9	11	10	8	13	6
Q95083	Prosalpha5	0	1.25	1.25	0	0.79	0	0.08	0	0	0	0	2	2	1	0	0	2	2	1
Q9VF23	CG4546	2.25	4.75	4.5	0.54	0.79	0	0.03	4	0	2	3	2	4	3	10	2	2	0	14
Q9VF92	ear	45	49.25	40.25	0.81	0.79	0	0	37	53	44	46	46	55	46	50	50	33	36	42
Q9VKV8	CG5343	4.5	4.5	4	0.86	0.79	0	0	5	3	5	5	6	6	4	2	4	3	4	5
Q9VUV9	CG5931	130.75	120.75	97.75	0.95	0.79	0	0	85	126	172	140	128	139	110	106	112	84	95	100
Q9W4B0	CG15780	20.75	16.25	13.5	1.08	0.79	0	0	20	21	23	19	19	11	22	13	18	13	15	8
Q9XZ19	CG3909	24.25	28.5	23	0.76	0.79	0	0	24	22	24	27	27	26	30	31	22	20	30	20
A8JRI1	heph	3.25	4.25	3.75	0.72	0.78	0	0.01	4	4	2	3	1	6	7	3	2	3	4	6
M9PDI0	miple2	1.25	1.5	1.5	0.76	0.78	0.01	0.14	0	2	2	1	1	4	1	0	2	0	1	3
O97125	Hsp68	51.75	45.5	38	0.99	0.78	0	0	45	52	61	49	40	53	40	49	36	32	35	49
P13469	mod	0.25	0.5	0.75	0.72	0.78	0	0.16	0	0	0	1	0	2	0	0	0	0	0	3
Q7JR58	CG6543	1.5	1	1.25	1	0.78	0.08	0.08	1	3	1	1	0	1	1	2	0	0	0	5
P54353	dod	17.75	15.25	13.25	0.98	0.77	0	0	14	19	20	18	15	20	18	8	15	12	8	18
Q7K0K1	CG2063	1.75	3.5	3.25	0.53	0.77	0	0	2	2	2	1	3	3	4	4	2	3	4	4
Q9V9K7	Ars2	18	17.75	15	0.86	0.77	0	0	15	16	20	21	19	17	17	18	16	16	15	13
Q9VGW7	Art1	6.25	4.25	4	1.14	0.77	0.01	0	6	6	5	8	5	4	3	5	6	5	0	5
Q9W1E8	or	8.75	8.75	7.5	0.86	0.77	0	0	7	10	9	9	7	12	8	8	8	5	8	9
Q9XYZ6	CG5808	45.5	39	33.25	0.99	0.77	0	0	37	50	44	51	39	50	40	27	37	35	24	37
A1Z8U0	Prp8	167	157.25	133.5	0.89	0.76	0	0	135	152	205	176	167	166	148	148	142	135	131	126
P25439-2	brm	35.5	31.25	28	0.94	0.76	0	0	17	41	43	41	42	47	19	17	49	21	1	41
Q7KM15	bic	8.25	7.75	6.75	0.89	0.76	0	0	9	8	9	7	6	9	8	8	7	7	7	6
Q9VJ12	Acn	23.75	24.75	21.25	0.82	0.76	0	0	19	31	22	23	24	33	24	18	21	22	17	25
P11046	LanB1	0.25	0.25	0.5	0.75	0.75	0	0	0	0	0	1	1	0	0	0	0	0	2	0
Q7K0X3	CG2469	62.75	71.75	61.75	0.73	0.75	0	0	61	67	62	61	68	67	72	80	53	65	71	58
Q7K3W2	CG8728-RA	28.5	34.5	29.75	0.73	0.75	0	0	46	25	25	18	23	30	28	57	24	42	22	31
Q95U01	CG15187	8.5	7.5	7	0.91	0.75	0	0	7	11	7	9	6	5	10	9	5	5	7	11
Q9VAX8	CG4849	108.5	100.75	86.75	0.89	0.75	0	0	92	99	135	108	112	109	96	86	101	91	81	74
Q9VTZ7	CG4069	21.5	27.75	24	0.66	0.75	0	0	20	24	19	23	23	31	30	27	19	27	25	25
Q9VVU4	CG6843	28	25.25	22	0.93	0.75	0	0	31	27	25	29	26	26	27	22	24	24	20	20
Q9VXU2	Gmap	0.75	0.5	0.75	0.9	0.75	0	0	1	0	1	1	0	1	0	1	0	2	0	1
Q9W3R9	CG1677-RA	25.25	28.5	24.75	0.75	0.75	0	0	22	24	30	25	28	31	30	25	23	27	23	26
P17133	snRNP-U1-70K	13.75	15.25	13.5	0.75	0.74	0	0	15	13	12	15	10	13	23	15	11	14	17	12
P22058	D1	2	3	3	0.6	0.74	0	0.01	1	3	1	3	4	2	5	1	4	3	3	2
Q7JWD6	Elongin-C	11.5	10.5	9.25	0.9	0.74	0	0	11	12	9	14	8	11	10	13	9	10	11	7
Q9V3Y5	BcDNA.LD23634	152.75	161.25	140.5	0.79	0.74	0	0	159	168	141	143	137	181	147	180	142	145	119	156
Q9V535	tsu	5.5	4.5	4.25	0.96	0.74	0	0	5	6	5	6	5	6	3	4	5	4	3	5
Q9VHC0	RnpS1	9	7.25	6.75	0.96	0.74	0	0	5	13	7	11	8	9	8	4	9	6	5	7
Q9VXT5	CG9213	26.25	25.75	22.75	0.84	0.74	0	0	25	26	25	29	27	32	26	18	20	22	24	25
Q9W1T4	LS2	6	3	3	1.3	0.74	0.26	0.01	2	9	8	5	4	4	4	0	3	3	3	3
P02828	Hsp83	22	26.25	23.5	0.69	0.73	0	0	20	22	22	24	27	28	24	26	16	25	28	25
Q05344	Ssrp	12.75	14	12.5	0.75	0.73	0	0	11	12	16	12	12	15	14	15	13	11	14	12
Q27415-2	Nlp	2.75	2.75	2.75	0.8	0.73	0	0	3	3	2	3	2	3	3	3	2	3	3	3
Q7K3M5	CG11107	54	41.5	37.25	1.06	0.73	0	0	43	64	64	45	37	64	34	31	39	33	24	53
Q9U9Q2	Neos	3.25	2	2.25	1.05	0.73	0.08	0.01	1	6	3	3	2	3	3	0	3	2	0	4
Q9VEJ1	SF1	9	11.75	10.75	0.65	0.73	0	0	9	8	10	9	9	15	10	13	10	10	9	14
Q9VF05	CG5516	4.75	4	4	0.89	0.73	0	0	3	5	6	5	5	5	4	2	4	5	2	5
Q9VH95	CG16817	1	1	1.25	0.77	0.73	0.02	0	1	1	0	2	1	1	1	1	0	1	2	2
Q9VQK5	CG3542	159.5	165	145.5	0.8	0.73	0	0	173	178	135	152	141	177	153	189	137	145	142	158
Q9W2N6	CG9346	6.25	3.75	3.75	1.16	0.73	0.01	0.01	7	6	6	6	4	3	7	1	3	3	5	4
E1JIJ7	CG7518	11.25	1	1.25	3.89	0.72	0.8	0	3	10	16	16	1	1	1	1	2	0	2	1
Q9W240	CG3927	0.25	1	1.25	0.52	0.72	0	0.08	0	1	0	0	0	2	2	0	1	0	2	2
A8JUV0-4	sno	6.5	10.75	9.75	0.52	0.71	0	0	7	6	6	7	8	12	12	11	5	9	17	8
Q24208-2	eIF-2gamma	0	0.5	1	0	0.71	0	0	0	0	0	0	1	1	0	0	0	0	0	4
Q8MPN3	trol	0.5	0.25	0.75	0.86	0.71	0.1	0	2	0	0	0	0	0	1	0	0	0	0	3
Q8T6B9	pUf68	26.5	23	21.5	0.89	0.71	0	0	23	25	32	26	27	24	21	20	24	19	21	22
Q94535	U2af38	8.5	8.5	8	0.79	0.71	0	0	10	8	9	7	7	8	10	9	8	9	8	7
Q961G6	CG7683	2.75	2	2.25	0.96	0.71	0.01	0.07	3	3	3	2	1	5	2	0	2	3	0	4
Q9V3W7	SF2	13.75	14	13	0.78	0.71	0	0	12	15	14	14	13	21	15	7	11	13	13	15
Q9VKV5	holn1	12.25	10.5	10	0.89	0.71	0	0	10	9	19	11	10	12	10	10	13	10	7	10
Q9VP22	Cdk12	49.5	52.25	47.75	0.75	0.71	0	0	38	59	48	53	48	69	45	47	56	47	37	51
Q9VPE2	CG6020	1.75	2.75	2.75	0.61	0.71	0	0.02	2	3	2	0	0	4	2	5	2	4	2	3
Q9VQF7	Bacc	1.5	1.25	1.5	0.84	0.71	0.01	0.02	2	1	1	2	1	2	1	1	0	2	2	2
M9NF33	CG7185	13	12.75	12	0.79	0.7	0	0	11	14	15	12	12	12	12	15	12	12	13	11
M9PBW9	rhea	0	0.25	0.75	0	0.7	0	0	0	0	0	0	1	0	0	0	1	0	0	2
Q86BR8	TFAM	1.25	0.25	0.75	1.15	0.7	0.23	0	1	2	2	0	0	0	0	1	0	0	0	3
Q8IH24	MED31	2.5	3	3.25	0.65	0.7	0	0	2	3	4	1	3	2	4	3	3	4	3	3
Q8MKJ6	CG11777	11.25	9.5	9	0.9	0.7	0	0	10	15	12	8	8	12	9	9	9	8	10	9
Q8SZR6	syndapin	9	6.75	6.75	0.97	0.7	0	0	7	9	10	10	9	6	6	6	8	7	5	7
Q9VIV2	swm	1.75	1.75	2	0.74	0.7	0	0.06	2	2	2	1	0	0	4	3	0	2	4	2
Q9VR99	cactin	54.25	50.75	47.5	0.83	0.7	0	0	52	56	52	57	56	54	59	34	44	49	49	48
Q02748	eIF-4a	3.5	4	4	0.7	0.69	0	0.01	3	5	2	4	3	8	2	3	2	5	5	4
Q7KTT0	Xe7	1.25	1.25	1.75	0.7	0.69	0.04	0.03	0	1	0	4	3	1	1	0	1	2	1	3
Q9VFT4	rin	0.25	0.75	1.25	0.57	0.69	0	0.08	0	1	0	0	0	2	0	1	0	0	0	5
A1ZBJ8	CG9975-RA	4.25	5	5.25	0.7	0.68	0	0	5	4	4	4	3	10	2	5	4	3	2	12
Q9V3C0	abs	48.5	40.25	39	0.9	0.68	0	0	46	48	47	53	41	42	41	37	39	48	31	38
Q9VCP0	EloA	20	21.75	20.5	0.72	0.68	0	0	22	28	15	15	16	25	20	26	18	20	24	20
Q9VLX2	CG7154	42.25	41.25	40.5	0.77	0.68	0	0	37	47	40	45	53	55	31	26	47	43	22	50
Q9VM49	CG11266	39	35.75	34.25	0.82	0.68	0	0	32	50	35	39	36	35	35	37	37	35	34	31
Q9VN21	lost	10.25	11.5	12.25	0.67	0.68	0	0	7	9	13	12	7	12	17	10	6	6	7	30
Q9VQI9-2	lilli	43.5	53.5	50.75	0.62	0.68	0	0	22	58	42	52	46	63	42	63	55	46	44	58
Q9VXU3	CG6340	10.75	10.25	10.25	0.77	0.68	0	0	10	14	7	12	10	11	14	6	12	10	10	9
Q9VYX1	e(y)2	7.75	5.25	5.5	1.01	0.68	0	0	8	9	7	7	7	5	5	4	7	6	5	4
Q9VZY0	CG1240	9.75	10.75	10.75	0.68	0.68	0	0	9	10	10	10	12	13	13	5	10	10	12	11
Q9W032	ecd	21	17	16.75	0.93	0.68	0	0	22	17	22	23	18	20	13	17	16	19	11	21
Q9W5Q1	CG17168	19.75	18.75	18	0.79	0.68	0	0	20	20	20	19	20	22	22	11	18	18	21	15
M9PC85	x16	6	6.25	6.5	0.7	0.67	0	0	7	5	7	5	7	7	9	2	4	8	9	5
O18335	Rab11	1	2	2.5	0.52	0.67	0	0.01	1	0	1	2	1	3	1	3	3	2	0	5
P12297	su(w[a])	22.75	19	18.75	0.88	0.67	0	0	22	17	21	31	27	25	12	12	23	20	16	16
P15357	RpS27A	7	7.75	8	0.68	0.67	0	0	7	8	7	6	8	7	7	9	7	9	7	9
Q9VJ87	ncm	60.75	56.25	54.75	0.81	0.67	0	0	60	62	47	74	52	62	57	54	53	62	48	56
A8JV07	CG9915	9	12.25	12.25	0.57	0.66	0	0	13	8	7	8	11	12	13	13	6	16	17	10
Q8IRG6-2	dre4	15.75	16.75	16.25	0.7	0.66	0	0	13	20	15	15	12	19	20	16	14	13	24	14
Q9V412	CG16865	2.5	2.25	2.5	0.79	0.66	0	0.04	2	3	3	2	0	5	2	2	0	0	6	4
Q9VJ74	CG10333	41.5	37.5	36.75	0.8	0.66	0	0	34	40	51	41	40	35	41	34	36	39	44	28
Q9VYW3	RPA3	0.75	1	1.5	0.61	0.66	0	0	0	1	1	1	1	1	1	1	1	1	2	2
Q9Y170	ocn	2.25	0.5	1	1.36	0.66	0.24	0.08	2	4	1	2	0	2	0	0	0	2	0	2
P23128-2	me31B	0	0.75	1.5	0	0.65	0	0	0	0	0	0	1	1	0	1	0	0	0	6
P54362	g	56	54	54.25	0.75	0.65	0	0	49	64	57	54	60	59	50	47	59	46	51	61
Q9V3H9	Nab2	2.25	2	2.5	0.74	0.65	0	0.01	0	3	2	4	1	4	2	1	4	2	1	3
Q9Y103	sip1	50	39.75	40.25	0.9	0.65	0	0	44	48	58	50	48	47	26	38	49	39	30	43
A8JNI2	CG7971	30.5	37.75	38.25	0.59	0.64	0	0	31	30	28	33	35	40	38	38	36	39	39	39
O96433	CycT	93.75	94.25	95	0.72	0.64	0	0	90	113	86	86	92	108	72	105	111	113	69	87
P30189	Top1	171	157	158	0.78	0.64	0	0	154	212	173	145	147	183	171	127	179	160	137	156
Q02427-1	Rbp1	7	7	7.5	0.71	0.64	0	0	6	7	6	9	6	9	9	4	6	7	9	8
Q9V468	CG9776	27.5	26.75	27.75	0.73	0.64	0	0	26	25	27	32	30	26	26	25	33	25	25	28
Q9VAQ7	Slu7	34	33.5	34.25	0.72	0.64	0	0	33	32	33	38	36	32	35	31	34	31	37	35
Q9VL63	CG31712	39.75	32.5	34	0.86	0.64	0	0	44	39	35	41	39	33	36	22	41	38	25	32
Q9VU43	SRm160	17.25	17.75	18.5	0.7	0.64	0	0	20	17	15	17	17	22	18	14	17	21	16	20
P26686-2	B52	66.25	68.75	70.25	0.68	0.63	0	0	67	71	59	68	65	77	82	51	60	71	78	72
Q86B99	CG31211	20	20.75	21.5	0.69	0.63	0	0	21	23	17	19	21	26	19	17	23	27	18	18
Q9GU68	eIF-5A	3.75	4.75	5.25	0.6	0.63	0	0	5	5	3	2	3	6	2	8	2	6	7	6
Q9VEA1	eIF-1A	3.25	3.75	4.5	0.6	0.63	0	0	2	4	3	4	5	3	5	2	3	5	5	5
Q9VL71	Srp54	19.5	19	20	0.72	0.63	0	0	22	20	17	19	18	21	21	16	22	21	17	20
Q9VWB6	CG6434	17.25	20.25	21.5	0.61	0.63	0	0	17	20	16	16	19	19	18	25	19	22	17	28
P33438	Glt	1.75	2	2.75	0.61	0.62	0	0.01	4	0	1	2	4	1	3	0	3	3	4	1
Q9VYE9	CG1622-RA	30	28	29.75	0.73	0.62	0	0	26	36	28	30	29	31	34	18	31	30	30	28
Q9W230	CG3732	2	2.5	3.25	0.57	0.62	0	0	1	2	2	3	3	2	3	2	4	4	2	3
Q7K2I4	CG7768	2	1.75	2.5	0.7	0.61	0	0	1	3	1	3	3	3	0	1	0	3	3	4
Q7KVP9	Xpd	1.5	1	1.75	0.79	0.61	0.02	0.1	1	1	3	1	0	0	0	4	3	0	0	4
Q9I7R7	CG18809	5	4.75	5.75	0.69	0.61	0	0	7	6	3	4	6	6	7	0	5	5	7	6
Q9VFF0	CG3731	32.75	36.75	38.75	0.63	0.61	0	0	49	33	28	21	32	32	29	54	34	54	35	32
Q9VGU5	CG6621	15.5	12.75	14.25	0.81	0.61	0	0	12	20	14	16	13	21	13	4	16	15	9	17
Q9VI14	CG15187	17	13.25	14.5	0.86	0.61	0	0	15	14	19	20	9	14	14	16	13	16	13	16
O44226	Elongin-B	6.75	7.75	8.75	0.6	0.6	0	0	6	11	5	5	5	10	6	10	6	7	12	10
Q95TU2	CG6686	211.5	178	191.25	0.8	0.6	0	0	203	226	203	214	209	189	188	126	213	210	175	167
Q9VC54	CG6695	6.75	8	9.25	0.57	0.6	0	0	5	9	8	5	6	9	13	4	8	10	9	10
Q9VH97	CG9492	1	0.5	1.25	0.75	0.6	0	0.04	1	1	1	1	2	0	0	0	1	1	2	1
Q9VIH1	RPA2	2	1.25	2	0.82	0.6	0	0	2	2	2	2	1	1	1	2	1	4	1	2
A1Z9L3	pea	76.75	64	69.75	0.79	0.59	0	0	67	77	79	84	71	72	63	50	64	75	77	63
Q24325	Taf2	80.25	72.75	80.25	0.72	0.59	0	0	74	82	78	87	72	75	78	66	84	76	80	81
Q868Z9-2	Ppn	1.5	1.75	3	0.57	0.59	0	0	3	0	1	2	3	1	3	0	0	1	2	9
Q9VB74	CG6066	9.75	12.25	14	0.54	0.59	0	0	10	11	9	9	12	14	12	11	14	17	11	14
Q9W1I6	ytr	11.25	8.75	10.25	0.8	0.59	0	0	9	12	11	13	9	9	10	7	11	10	11	9
P48375	FK506-bp2	0.75	0.25	1	0.77	0.58	0.04	0	1	0	0	2	1	0	0	0	0	1	2	1
Q9V3V1	EG:BACR42I17.12	2	1	1.75	0.84	0.58	0.02	0.02	1	2	3	2	2	0	0	2	1	3	3	0
Q9VY79	CG11095	0.25	0.25	1	0.61	0.58	0	0	1	0	0	0	0	0	0	1	1	2	0	1
A1ZBN3	sm	16.25	12.75	15	0.76	0.56	0	0	8	18	23	16	7	16	27	1	18	9	22	11
Q7KVQ0	CG4038	6.75	7.25	8.75	0.6	0.56	0	0	6	10	4	7	4	10	5	10	8	9	9	9
Q9VCD4	CG18428	21	15.25	18.5	0.83	0.56	0	0	20	22	21	21	17	15	15	14	17	17	20	20
Q9VDI8	Syp	41.25	36	42	0.71	0.56	0	0	32	55	36	42	30	41	38	35	46	39	41	42
Q9VES0	CG10324-RA	46.25	44.5	51.75	0.65	0.56	0	0	51	42	44	48	47	51	48	32	50	54	53	50
Q9VQF5	Cwc25	32.25	28	33	0.71	0.56	0	0	32	33	25	39	31	28	32	21	32	39	34	27
Q0IGP7	CG34334	1	0.75	1.75	0.64	0.55	0.01	0.01	0	2	0	2	0	2	1	0	2	0	1	4
Q7K1H5	CG11808	10.25	8	10	0.76	0.55	0	0	11	12	8	10	8	11	7	6	11	11	10	8
Q9VIZ3	l(2)37Cb	111.75	100	117.5	0.68	0.55	0	0	107	105	114	121	113	108	113	66	109	132	125	104
Q9VQZ5	CG15432-RA	2.25	2.75	4	0.52	0.55	0	0	1	3	3	2	2	3	3	3	4	5	3	4
O97102	smt3	5.75	4.75	6.5	0.69	0.54	0	0	6	6	6	5	4	5	5	5	6	7	6	7
Q961C4	Ude	4.25	3.25	4.75	0.71	0.54	0	0	4	3	5	5	4	4	4	1	4	5	5	5
Q9VFA0	CG4338	0.25	0.75	1.75	0.42	0.54	0	0.01	0	1	0	0	0	1	2	0	1	2	2	2
Q9VHB0	CG8273	35.25	29	35.25	0.74	0.54	0	0	36	40	32	33	26	33	33	24	43	31	29	38
Q9VAW1	Moca-cyp	35.25	29.25	36.25	0.7	0.53	0	0	29	46	35	31	29	36	32	20	41	34	37	33
Q9W227	CG2852	1.5	2.75	4.25	0.41	0.53	0	0	3	0	1	2	2	3	4	2	2	4	5	6
P19018-2	tra2	8.75	7	9.5	0.71	0.52	0	0	9	10	6	10	7	11	7	3	12	10	6	10
Q24492	RpA-70	2.75	1.5	2.75	0.82	0.52	0	0	4	3	2	2	1	3	1	1	3	4	1	3
Q9XZ21	snama	83.75	68.75	85.75	0.71	0.52	0	0	78	100	71	86	66	80	63	66	98	94	69	82
A1Z9Z1	CG8079-RB	20.75	20.25	27	0.57	0.51	0	0	20	23	18	22	21	15	25	20	25	26	27	30
Q9VCG6	tbrd-1	11.25	9	12.25	0.68	0.51	0	0	8	10	14	13	8	11	11	6	14	10	12	13
Q9VI54	CG1965	35.25	30.75	40.75	0.64	0.51	0	0	30	35	33	43	41	33	28	21	50	33	34	46
Q9VVI1	CG7564	13.75	12	16	0.63	0.51	0	0	12	13	15	15	14	13	13	8	15	16	19	14
Q9V3T8	SC35	8.75	6.5	9.25	0.71	0.5	0	0	11	9	8	7	6	9	10	1	6	10	13	8
Q9V460	Spt5	2	3.75	5.5	0.37	0.5	0	0	3	5	0	0	3	8	3	1	3	4	10	5
Q9VBR4	CG11913	12.5	7.5	10.5	0.88	0.5	0	0	12	14	12	12	5	11	6	8	12	11	7	12
Q9VD28	PSR	2	2.5	4.25	0.46	0.5	0	0	2	3	1	2	3	2	3	2	4	5	4	4
Q9VHL2	Tcp-1eta	1	1	2.25	0.54	0.5	0	0.01	0	1	2	1	0	3	0	1	0	0	3	6
Q9VXW3	CG12608	23.5	18	24.25	0.71	0.5	0	0	27	26	21	20	20	22	22	8	22	26	25	24
Q9VZU4	CG12079	20	14.75	20.25	0.73	0.5	0	0	19	20	20	21	15	14	13	17	18	23	18	22
A1ZA66	Strn-Mlck	1	0.5	1.5	0.66	0.49	0.02	0.03	0	0	2	2	0	2	0	0	0	4	2	0
Q4V551	CG7907	5.75	3.25	5.25	0.82	0.49	0	0	5	5	7	6	2	3	4	4	7	5	4	5
Q9VFF2	CG33332-RA	46.25	35.75	48.5	0.7	0.49	0	0	53	38	37	57	39	42	41	21	49	55	43	47
Q9Y145	BcDNA.GH04978	80	65	86.5	0.67	0.49	0	0	79	83	73	85	78	75	65	42	91	96	78	81
Q9VR29	CG3225	125.75	95.25	138.25	0.66	0.46	0	0	113	122	133	135	123	101	90	67	161	183	73	136
Q9VJ86	bsf	2.75	2	4.5	0.58	0.44	0	0	4	4	0	3	2	0	2	4	3	2	3	10
P41043	GstS1	1.75	1.75	4	0.45	0.42	0	0	2	2	1	2	2	2	1	2	3	4	5	4
Q9VXW4	CG9123-RA	27.5	20.5	32.25	0.61	0.42	0	0	27	35	24	24	22	24	26	10	25	35	44	25
Q9VTB4	CG6463	6.75	3.75	7.75	0.66	0.39	0	0	4	5	10	8	4	5	4	2	9	8	6	8
Q9VUA0	CG8833	96.25	67	115	0.61	0.38	0	0	104	102	87	92	83	72	63	50	123	133	99	105
Q4V5A7	CG7229	6	4.25	9.25	0.51	0.36	0	0	3	8	7	6	3	5	4	5	8	11	8	10
Q9VAZ1	hanabi	2	0.5	2.75	0.68	0.35	0	0	3	1	1	3	0	0	0	2	1	4	2	4
Q9VJL9	BG:DS02740.2	71.5	45.25	84.75	0.61	0.35	0	0	74	75	63	74	58	47	50	26	86	98	84	71
Q9VFN5	CG9920	1.5	0.5	2.75	0.54	0.34	0	0	1	1	2	2	0	0	1	1	2	3	4	2
Q9VLR5	Ssb-c31a	37.5	24.25	48	0.57	0.34	0	0	39	39	29	43	31	26	30	10	38	52	54	48
M9PDT1	CG2861	2	0.5	3.25	0.56	0.32	0	0	0	2	3	3	2	0	0	0	5	0	4	4
Q9VYT3	CG2025	4.75	2.5	7.5	0.51	0.31	0	0	2	4	7	6	3	3	4	0	7	10	6	7
Q9VBQ3	CG5111-RA	2	1.5	27	0.09	0.07	0	0	4	2	1	1	2	3	0	1	24	31	31	22
M9PC82	CG12674	1	0	0.25	1.39	0	0.38	0	0	2	2	0	0	0	0	0	0	0	0	1
O46307	fs(1)N	0.75	0	1.25	0.68	0	0	0	1	1	0	1	0	0	0	0	1	1	2	1
P15215	LanB2	0.25	0	0.75	0.66	0	0	0	1	0	0	0	0	0	0	0	0	1	2	0
Q7K4M4	tef	12.25	0	0	9.79	0	1	0	7	10	14	18	0	0	0	0	0	0	0	0
Q9I7D3	Capr	0.5	0	1.75	0.54	0	0	0	0	1	0	1	0	0	0	0	0	0	0	7
Q9VAZ0	CG5003-RA	4.5	0	0	4.3	0	0.99	0	5	2	6	5	0	0	0	0	0	0	0	0
Q9VG88	CG33098-RB	1.5	0	0	2.03	0	0.6	0	0	1	4	1	0	0	0	0	0	0	0	0
