# Supplementary material for: Chromosome separation during Drosophila male meiosis I requires separase-mediated cleavage of the homolog conjunction protein UNO
Source: PLoS Genet. 2020 Oct 1;16(10):e1008928. doi: 10.1371/journal.pgen.1008928 (PMC7529252; doi:10.1371/journal.pgen.1008928)
Supplement: S2 Table — (XLSX) [file pgen.1008928.s020.xlsx]

## Sheet: Tabelle1
Figure	Label on Figure	genotypes
1A	bam > mnm-EGFP	w*, P{w+, bamP-GAL4-VP16}X;; P{w+, UASt-mnm-EGFP} III.1
	bam > snm-EGFP	w*, P{w+, bamP-GAL4-VP16}X;; P{w+, UASt-snm-EGFP} III.1
	exumP-EGFP	w*; attP40{exumP-EGFP}
2B-E	+	w[1118]
	bam>unoRNAi	w*, P{w+, bamP-GAL4-VP16}X; P{GD14007}v46108/ +; TM6B, Tb Hu/ +
	uno[cc1]/Df	w*; uno[cc1]/ Df(2R)Exel7094
	uno[cc1]/Df + g-EGFP-uno	w*; uno[cc1]/ Df(2R)Exel7094; P{w+, g_EGFP-uno} III.2/ +
	uno[cc1]/Df + g-uno-EGFP	w*; uno[cc1]/ Df(2R)Exel7094; P{w+, g_uno-EGFP} III.1/ +
	uno[cc1]/Df + bam>uno-EGFP	w*, P{w+, bamP-GAL4-VP16}X; Df(2R)Exel7094, P{w+, UASt-uno-EGFP} II.2/ uno[cc1]
2F,G	+	w*; P{w+, gCid-EGFP-Cid} II.1, P{w+, His2Av-mRFP}II.2/CyO
	uno[cc1]/Df	w*; uno[cc1]/ Df(2R)Exel7094; P{w+, gCid-EGFP-Cid} III.2, P{w+, His2Av-mRFP}III.1/ +
	bam>unoRNAi	w*; P{GD14007}v46108/P{w+, gCid-EGFP-Cid} II.2, P{w+, His2Av-mRFP} II.2; P{w+, bamP-GAL4-VP16}III/ +
3A	+	w[1118]
	uno[cc1]/Df	w*; uno[cc1]/ Df(2R)Exel7094
3B		w[1118]
3C		w*; uno[cc1]/ Df(2R)Exel7094; P{w+, g_uno-EGFP}III.1/+
4A		w*, P{w+, bamP-GAL4-VP16}X;; P{w+, UASt-mnm-EGFP}III.1 / TM6B, Tb Hu
4B		w*, P{w+, bamP-GAL4-VP16}X;; P{w+, UASt-snm-EGFP}III.1 / TM6B, Tb Hu
4C	+	w*; P{w+, g_uno-EGFP}II.1/CyO, ftz-lacZ; +/+
	mnm-	w*; P{w+, g_uno-EGFP}II.1/+; mnm[Z3-5578]/ mnm[Z3-3298]
	snm-	w*; P{w+, g_uno-EGFP}II.1/+; snm[Z3-2138]/ snm[Z3-0317]
	tef-	w*; cn tef[Z2-4169] bw/ cn tef[Z2-3455] bw; P{w+, g_uno-EGFP}III.1/ +
4D	+	w*, P{w+, bamP-GAL4-VP16}X;; P{w+, UASt-mnm-EGFP}III.1 / TM6B, Tb Hu
	bam>unoRNAi	w*, P{w+, bamP-GAL4-VP16}X; P{GD14007}v46108/+ ; P{w+, UASt-mnm-EGFP}III.1 / +
4E	+	w*, P{w+, bamP-GAL4-VP16}X;; P{w+, UASt-snm-EGFP}III.1 / TM6B, Tb Hu
	bam>unoRNAi	w*, P{w+, bamP-GAL4-VP16}X; P{GD14007}v46108/+ ; P{w+, UASt-snm-EGFP}III.1 / +
5	bam>uno-EGFP in uno[cc1]	w*; uno[cc1]/ uno[cc1]; P{w+, His2Av-mRFP}III.1, P{w+, bamP-GAL4-VP16}III/ P{w+, UASt-uno-EGFP}III.1
	bam>uno-EGFP and thrRNAi	w*; P{w+, His2Av-mRFP}II.2/ + ; P{w+, bamP-GAL4-VP16}III/ P{w+, UASt-uno-EGFP} III.1, attP2{v+, UAS-V20thr-shmiR9}
7	bam>uno[nc]-EGFP in uno[cc1]	w*; uno[cc1]/ uno[cc1]; P{w+, His2Av-mRFP}III.1, P{w+, bamP-GAL4-VP16}III/ P{w+, UASt-uno[nc]-EGFP}III.2
	bam>uno[nc]-EGFP in uno[+]	w*; P{w+, His2Av-mRFP}II.2/+ or TG; P{w+, bamP-GAL4-VP16}III/+ or TG (TG = P{w+, UASt-uno[nc]-EGFP}
S4	w[1118]	w[1118]
	bam>uno[RNAi]	w*, P{w+, bamP-GAL4-VP16}X; P{GD14007}v46108/ +; TM6B, Tb Hu/ +
	uno[cc1]/ Df(2R)Exel7094	w*; uno[cc1]/ Df(2R)Exel7094
	g-EGFP-uno in uno[cc1]/ Df(2R)Exel7094	w*; uno[cc1]/ Df(2R)Exel7094; P{w+, g_EGFP-uno} III.2/ +
	g-uno-EGFP in uno[cc1]/ Df(2R)Exel7094	w*; uno[cc1]/ Df(2R)Exel7094; P{w+, g_uno-EGFP} III.1/ +
	bam>uno-EGFP in uno[cc1]/ Df(2R)Exel7094	w*, P{w+, bamP-GAL4-VP16}X; Df(2R)Exel7094, P{w+, UASt-uno-EGFP} II.2/ uno[cc1]
S5		w*; uno[cc1]/ Df(2R)Exel7094; P{w+, gCid-EGFP-Cid} III.2, P{w+, His2Av-mRFP}III.1/ +
S6B	CG32117-EGFP	w*; P{w+, gCG32117-EGFP}III.1
	control	w*; P{w+, gitdTomato2x-Cenp-C}III.3
S6C	bam>CG32117-EGFP	w*; P{w+, UASt-CG32117-EGFP}II.1/ +; P{w+, bamP-GAL4-VP16}III/ +
	control	w*; P{w+, gitdTomato2x-Cenp-C}III.3
S7A	bam>uno-EGFP in uno[+]	w*; P{w+, His2Av-mRFP}II.2/+ ; P{w+, bamP-GAL4-VP16}III/P{w+, UASt-uno-EGFP} III.1
S7B	bam>uno-EGFP in uno[+]	w*; P{w+, His2Av-mRFP}II.2/+ ; P{w+, bamP-GAL4-VP16}III/P{w+, UASt-uno-EGFP} III.1
	bam>uno-EGFP in uno[cc1]	w*; uno[cc1]/ uno[cc1]; P{w+, His2Av-mRFP}III.1, P{w+, bamP-GAL4-VP16}III/ P{w+, UASt-uno-EGFP}III.1
S7C,D	mnnm-EGFP cid-EGFP His2Av-mRFP	w*;; P{ry+, hsp70-mnm-EGFP}III/ P{w+; gHis2Av-mRFP} III.1, P{w+; cid-EGFP-cid} III.1
S1_Movie		w*; uno[cc1]/ Df(2R)Exel7094; P{w+, gCid-EGFP-Cid} III.2, P{w+, His2Av-mRFP}III.1/ +
S2_Movie		w*; uno[cc1]/ uno[cc1]; P{w+, His2Av-mRFP}III.1, P{w+, bamP-GAL4-VP16}III/ P{w+, UASt-uno-EGFP}III.1
S3_Movie		w*; uno[cc1]/ uno[cc1]; P{w+, His2Av-mRFP}III.1, P{w+, bamP-GAL4-VP16}III/ P{w+, UASt-uno-EGFP}III.1
S4_Movie		w*; P{w+, His2Av-mRFP}II.2/+ ; P{w+, bamP-GAL4-VP16}III/P{w+, UASt-uno-EGFP} III.1
S5_Movie		w*;; P{ry+, hsp70-mnm-EGFP}III/ P{w+; gHis2Av-mRFP} III.1, P{w+; cid-EGFP-cid} III.1
S6_Movie		w*; P{w+, His2Av-mRFP}II.2/ + ; P{w+, bamP-GAL4-VP16}III/ P{w+, UASt-uno-EGFP} III.1, attP2{v+, UAS-V20thr-shmiR9}
S7_Movie		w*; uno[cc1]/ uno[cc1]; P{w+, His2Av-mRFP}III.1, P{w+, bamP-GAL4-VP16}III/ P{w+, UASt-uno[nc]-EGFP}III.2
S8_Movie		w*; uno[cc1]/ uno[cc1]; P{w+, His2Av-mRFP}III.1, P{w+, bamP-GAL4-VP16}III/ P{w+, UASt-uno[nc]-EGFP}III.2
S9_Movie		w*; P{w+, His2Av-mRFP}II.2/+ or TG; P{w+, bamP-GAL4-VP16}III/+ or TG (TG = P{w+, UASt-uno[nc]-EGFP}
S10_Movie		w*; P{w+, His2Av-mRFP}II.2/+ or TG; P{w+, bamP-GAL4-VP16}III/+ or TG (TG = P{w+, UASt-uno[nc]-EGFP}
